# Supplementary material
Source: publisher figshare collection journal article supplement (https://brill.figshare.com/articles/dataset/_/27888720)
Supplement: Supplementary file 1 [file 1]

## Sheet: Supplementary data 1
Family	Genus	Sp1	Author1	Growth forms
Acanthaceae	Anisotes	formosissimus	(Klotzsch) Milne-Redh.	Shrub
Acanthaceae	Anisotes	rogersii	S.Moore	Shrub
Acanthaceae	Avicennia	marina	(Forssk.) Vierh.	Tree
Acanthaceae	Barleria	albostellata	C.B.Clarke	Shrub
Acanthaceae	Justicia	bolusii	C.B.Clarke	Shrub
Acanthaceae	Mackaya	bella	Harv.	Shrub; Tree
Acanthaceae	Metarungia	galpinii	(Baden) Baden	Shrub
Acanthaceae	Metarungia	longistrobus	(C.B.Clarke) Baden	Shrub
Acanthaceae	Metarungia	pubinervia	(T.Anderson) Baden	Shrub
Acanthaceae	Ruspolia	australis	(Milne-Redh.) Vollesen	Shrub
Acanthaceae	Ruttya	ovata	Harv.	Shrub
Acanthaceae	Sclerochiton	apiculatus	Vollesen	Climber; Shrub
Acanthaceae	Sclerochiton	harveyanus	Nees	Shrub
Acanthaceae	Sclerochiton	ilicifolius	A.Meeuse	Shrub
Acanthaceae	Sclerochiton	odoratissimus	Hilliard	Shrub
Acanthaceae	Sclerochiton	triacanthus	A.Meeuse	Shrub
Achariaceae	Ceratiosicyos	laevis	(Thunb.) A.Meeuse	Climber; Shrub
Achariaceae	Kiggelaria	africana	L.	Shrub; Tree
Achariaceae	Rawsonia	lucida	Harv. & Sond.	Tree
Achariaceae	Xylotheca	kraussiana	Hochst.	Shrub; Tree
Aizoaceae	Galenia	africana	L.	Shrub
Aizoaceae	Schlechteranthus	holgatensis	Klak	Shrub
Amaranthaceae	Atriplex	cinerea	Poir.	Shrub
Amaranthaceae	Atriplex	vestita	(Thunb.) Aellen	Shrub
Amaranthaceae	Exomis	microphylla	(Thunb.) Aellen	Shrub
Amaranthaceae	Hermbstaedtia	glauca	(J.C.Wendl.) Rchb. ex Steud.	Shrub
Amaranthaceae	Manochlamys	albicans	(Aiton) Aellen	Shrub
Amaranthaceae	Salsola	angolensis	Botsch.	Shrub
Amaranthaceae	Salsola	aphylla	L.f.	Shrub
Amaranthaceae	Salsola	apterygea	Botsch.	Shrub
Amaranthaceae	Salsola	arborea	C.A.Sm. ex Aellen	Shrub
Amaranthaceae	Salsola	barbata	Aellen	Shrub
Amaranthaceae	Salsola	cryptoptera	Aellen	Shrub
Amaranthaceae	Salsola	koichabica	Botsch.	Shrub
Amaranthaceae	Salsola	merxmuelleri	Aellen	Shrub
Amaranthaceae	Salsola	nollothensis	Aellen	Shrub
Amaranthaceae	Salsola	procera	Botsch.	Shrub
Amaranthaceae	Salsola	scopiformis	Botsch.	Shrub
Amaranthaceae	Tecticornia	indica	(Willd.) K.A.Sheph. & Paul G.Wilson	Shrub
Anacardiaceae	Harpephyllum	caffrum	Bernh. ex Krauss	Tree
Anacardiaceae	Heeria	argentea	(Thunb.) Meisn.	Tree
Anacardiaceae	Lannea	discolor	(Sond.) Engl.	Tree
Anacardiaceae	Lannea	schweinfurthii	(Engl.) Engl.	Tree
Anacardiaceae	Laurophyllus	capensis	Thunb.	Tree
Anacardiaceae	Loxostylis	alata	A.Spreng. ex Rchb.	Shrub; Tree
Anacardiaceae	Ozoroa	albicans	R.Fern. & A.Fern.	Tree
Anacardiaceae	Ozoroa	concolor	(C.Presl ex Sond.) De Winter	Shrub; Tree
Anacardiaceae	Ozoroa	crassinervia	(Engl.) R.Fern. & A.Fern.	Shrub; Tree
Anacardiaceae	Ozoroa	dispar	(C.Presl) R.Fern. & A.Fern.	Shrub; Tree
Anacardiaceae	Ozoroa	engleri	R.Fern. & A.Fern.	Shrub; Tree
Anacardiaceae	Ozoroa	mucronata	(Bernh.) R.Fern. & A.Fern.	Shrub; Tree
Anacardiaceae	Ozoroa	namaensis	(Schinz & Dinter) R.Fern.	Shrub; Tree
Anacardiaceae	Ozoroa	namaquensis	(Sprague) Von Teichman & A.E.van Wyk	Shrub; Tree
Anacardiaceae	Ozoroa	obovata	(Oliv.) R.Fern. & A.Fern.	Shrub; Tree
Anacardiaceae	Ozoroa	paniculosa	(Sond.) R.Fern. & A.Fern.	Shrub; Tree
Anacardiaceae	Ozoroa	sphaerocarpa	R.Fern. & A.Fern.	Shrub; Tree
Anacardiaceae	Protorhus	longifolia	(Bernh.) Engl.	Tree
Anacardiaceae	Sclerocarya	birrea	(A.Rich.) Hochst.	Tree
Anacardiaceae	Searsia	acocksii	(Moffett) Moffett	Climber; Shrub
Anacardiaceae	Searsia	albomarginata	(Sond.) Moffett	Shrub
Anacardiaceae	Searsia	batophylla	(Codd) Moffett	Shrub
Anacardiaceae	Searsia	bolusii	(Sond. ex Engl.) Moffett	Shrub; Tree
Anacardiaceae	Searsia	burchellii	(Sond. ex Engl.) Moffett	Shrub; Tree
Anacardiaceae	Searsia	chirindensis	(Baker f.) Moffett	Tree; Shrub
Anacardiaceae	Searsia	ciliata	(Licht. ex Schult.) A.J.Mill.	Shrub
Anacardiaceae	Searsia	crenata	(Thunb.) Moffett	Tree; Shrub
Anacardiaceae	Searsia	dentata	(Thunb.) F.A.Barkley	Shrub; Tree
Anacardiaceae	Searsia	divaricata	(Eckl. & Zeyh.) Moffett	Tree; Shrub
Anacardiaceae	Searsia	dregeana	(Sond.) Moffett	Shrub
Anacardiaceae	Searsia	engleri	(Britten) Moffett	Shrub; Tree
Anacardiaceae	Searsia	erosa	(Thunb.) Moffett	Shrub
Anacardiaceae	Searsia	fastigata	(Eckl. & Zeyh.) Moffett	Shrub
Anacardiaceae	Searsia	gerrardii	(Harv. ex Engl.) Moffett	Shrub
Anacardiaceae	Searsia	glauca	(Thunb.) Moffett	Tree; Shrub
Anacardiaceae	Searsia	grandidens	(Harv. ex Engl.) Moffett	Shrub
Anacardiaceae	Searsia	gueinzii	(Sond.) F.A.Barkley	Shrub; Tree
Anacardiaceae	Searsia	horrida	(Eckl. & Zeyh.) Moffett	Shrub
Anacardiaceae	Searsia	incisa	(L.f.) F.A.Barkley	Tree; Shrub
Anacardiaceae	Searsia	keetii	(Schonland) Moffett	Shrub
Anacardiaceae	Searsia	krebsiana	(C.Presl ex Engl.) Moffett	Tree; Shrub
Anacardiaceae	Searsia	laevigata	(L.) F.A.Barkley	Tree; Shrub
Anacardiaceae	Searsia	lancea	(L.f.) F.A.Barkley	Shrub; Tree
Anacardiaceae	Searsia	leptodictya	(Diels) T.S.Yi, A.J.Mill. & J.Wen	Shrub; Tree
Anacardiaceae	Searsia	longispina	(Eckl. & Zeyh.) Moffett	Tree; Shrub
Anacardiaceae	Searsia	lucida	(L.) F.A.Barkley	Tree; Shrub
Anacardiaceae	Searsia	montana	(Diels) Moffett	Shrub; Tree
Anacardiaceae	Searsia	natalensis	(Bernh. ex C.Krauss) F.A.Barkley	Shrub; Tree
Anacardiaceae	Searsia	nebulosa	(Schonland) Moffett	Shrub
Anacardiaceae	Searsia	pallens	(Eckl. & Zeyh.) Moffett	Tree; Shrub
Anacardiaceae	Searsia	pendulina	(Jacq.) Moffett	Shrub; Tree
Anacardiaceae	Searsia	pentheri	(Zahlbr.) Moffett	Shrub; Tree
Anacardiaceae	Searsia	populifolia	(E.Mey. ex Sond.) Moffett	Tree; Shrub
Anacardiaceae	Searsia	pterota	(C.Presl) Moffett	Tree; Shrub
Anacardiaceae	Searsia	pyroides	(Burch.) Moffett	Tree; Shrub
Anacardiaceae	Searsia	refracta	(Eckl. & Zeyh.) Moffett	Tree; Shrub
Anacardiaceae	Searsia	rehmanniana	(Engl.) Moffett	Tree; Shrub
Anacardiaceae	Searsia	rigida	(Mill.) F.A.Barkley	Shrub
Anacardiaceae	Searsia	rimosa	(Eckl. & Zeyh.) Moffett	Shrub
Anacardiaceae	Searsia	rosmarinifolia	(Vahl) F.A.Barkley	Shrub
Anacardiaceae	Searsia	scytophylla	(Eckl. & Zeyh.) Moffett	Shrub
Anacardiaceae	Searsia	sekhukhuniensis	(Moffett) Moffett	Shrub
Anacardiaceae	Searsia	tenuinervis	(Engl.) Moffett	Tree; Shrub
Anacardiaceae	Searsia	tomentosa	(L.) F.A.Barkley	Tree; Shrub
Anacardiaceae	Searsia	transvaalensis	(Engl.) Moffett	Shrub; Tree
Anacardiaceae	Searsia	tridactyla	(Burch.) Moffett	Tree; Shrub
Anacardiaceae	Searsia	tumulicola	(S.Moore) Moffett	Tree; Shrub
Anacardiaceae	Searsia	undulata	(Jacq.) T.S.Yi, A.J.Mill. & J.Wen	Shrub
Anacardiaceae	Searsia	wilmsii	(Diels) Moffett	Shrub
Anacardiaceae	Searsia	zeyheri	(Sond.) Moffett	Shrub
Annonaceae	Annona	senegalensis	Pers.	Tree; Shrub
Annonaceae	Artabotrys	brachypetalus	Benth.	Climber; Shrub; Tree
Annonaceae	Artabotrys	monteiroae	Oliv.	Tree; Climber; Shrub
Annonaceae	Hexalobus	monopetalus	(A.Rich.) Engl. & Diels	Tree; Shrub
Annonaceae	Monanthotaxis	caffra	(Sond.) Verdc.	Tree; Climber; Shrub
Annonaceae	Monanthotaxis	maputensis	P.H.Hoekstra	Shrub
Annonaceae	Monodora	junodii	Engl. & Diels	Shrub; Tree
Annonaceae	Uvaria	caffra	E.Mey. ex Sond.	Tree; Climber; Shrub
Annonaceae	Uvaria	gracilipes	N.Robson	Climber; Shrub
Annonaceae	Uvaria	lucida	Benth.	Climber; Shrub
Annonaceae	Xylopia	parviflora	(A.Rich.) Benth.	Tree
Aphloiaceae	Aphloia	theiformis	(Vahl) Benn.	Shrub; Tree
Apiaceae	Anginon	difforme	(L.) B.L.Burtt	Shrub
Apiaceae	Anginon	fruticosum	I.Allison & B.-E.van Wyk	Shrub
Apiaceae	Anginon	intermedium	I.Allison & B.-E.van Wyk	Shrub
Apiaceae	Anginon	jaarsveldii	B.L.Burtt	Shrub
Apiaceae	Anginon	paniculatum	(Thunb.) B.L.Burtt	Shrub
Apiaceae	Anginon	rugosum	(Thunb.) Raf.	Shrub
Apiaceae	Anginon	swellendamensis	(Eckl. & Zeyh.) B.L.Burtt	Shrub
Apiaceae	Anginon	tenuius	I.Allison & B.-E.van Wyk	Shrub
Apiaceae	Anginon	ternatum	I.Allison & B.-E.van Wyk	Shrub
Apiaceae	Anginon	verticillatum	(Sond.) B.L.Burtt	Shrub
Apiaceae	Centella	linifolia	(L.f.) Drude	Shrub
Apiaceae	Deverra	aphylla	(Cham. & Schltdl.) DC.	Shrub
Apiaceae	Deverra	burchellii	(DC.) Eckl. & Zeyh.	Shrub
Apiaceae	Heteromorpha	arborescens	(Spreng.) Cham. & Schltdl.	Shrub
Apiaceae	Heteromorpha	involucrata	Conrath	Shrub
Apiaceae	Heteromorpha	pubescens	Burtt Davy	Shrub
Apiaceae	Notobubon	capense	(Eckl. & Zeyh.) Magee	Shrub
Apiaceae	Notobubon	ferulaceum	(Thunb.) Magee	Shrub
Apiaceae	Notobubon	galbaniopse	(H.Wolff) Magee	Shrub
Apiaceae	Notobubon	galbanum	(L.) Magee	Shrub
Apiaceae	Notobubon	gummiferum	(L.) Magee	Shrub
Apiaceae	Notobubon	laevigatum	(Aiton) Magee	Shrub
Apiaceae	Notobubon	montanum	(Eckl. & Zeyh.) Magee	Shrub
Apiaceae	Notobubon	pearsonii	(Adamson) Magee	Shrub
Apiaceae	Notobubon	pungens	(Sond.) Magee	Shrub
Apiaceae	Notobubon	sonderi	(M.Hiroe) Magee	Shrub
Apiaceae	Notobubon	tenuifolium	(Thunb.) Magee	Shrub
Apiaceae	Polemannia	grossulariifolia	Eckl. & Zeyh.	Shrub
Apiaceae	Polemannia	montana	Schltr. & H.Wolff	Tree; Shrub
Apiaceae	Polemannia	simplicior	Hilliard & B.L.Burtt	Shrub
Apiaceae	Polemanniopsis	marlothii	(H.Wolff) B.L.Burtt	Shrub
Apocynaceae	Acokanthera	oblongifolia	(Hochst.) Codd	Shrub; Tree
Apocynaceae	Acokanthera	oppositifolia	(Lam.) Codd	Shrub; Tree
Apocynaceae	Acokanthera	rotundata	(Codd) Kupicha	Shrub; Tree
Apocynaceae	Ancylobothrys	capensis	(Oliv.) Pichon	Climber; Shrub
Apocynaceae	Ancylobothrys	petersiana	(Klotzsch) Pierre	Climber; Shrub
Apocynaceae	Callichilia	orientalis	S.Moore	Shrub; Tree
Apocynaceae	Carissa	bispinosa	(L.) Desf. ex Brenan	Shrub
Apocynaceae	Carissa	macrocarpa	(Eckl.) A.DC.	Shrub
Apocynaceae	Carissa	spinarum	L.	Shrub
Apocynaceae	Carissa	tetramera	(Sacleux) Stapf	Shrub
Apocynaceae	Cryptolepis	cryptolepioides	(Schltr.) Bullock	Climber; Shrub
Apocynaceae	Cryptolepis	decidua	(Planch. ex Benth.) N.E.Br.	Shrub
Apocynaceae	Diplorhynchus	condylocarpon	(Mull.Arg.) Pichon	Shrub; Tree
Apocynaceae	Ectadium	virgatum	E.Mey.	Shrub
Apocynaceae	Gomphocarpus	filiformis	(E.Mey.) D.Dietr.	Shrub
Apocynaceae	Gonioma	kamassi	E.Mey.	Shrub; Tree
Apocynaceae	Holarrhena	pubescens	(Buch.-Ham.) Wall. ex G.Don	Shrub; Tree
Apocynaceae	Landolphia	kirkii	Dyer ex Hook.f.	Climber; Shrub
Apocynaceae	Microloma	incanum	Decne.	Shrub
Apocynaceae	Oncinotis	tenuiloba	Stapf	Climber; Shrub
Apocynaceae	Rauvolfia	caffra	Sond.	Tree
Apocynaceae	Rhyssolobium	dumosum	E.Mey.	Shrub
Apocynaceae	Stomatostemma	monteiroae	(Oliv.) N.E.Br.	Climber; Shrub
Apocynaceae	Strophanthus	kombe	Oliv.	Climber; Shrub
Apocynaceae	Strophanthus	luteolus	Codd	Shrub; Climber
Apocynaceae	Strophanthus	petersianus	Klotzsch	Climber; Shrub
Apocynaceae	Strophanthus	speciosus	(Ward & Harv.) Reber	Climber; Shrub
Apocynaceae	Tabernaemontana	elegans	Stapf	Shrub; Tree
Apocynaceae	Tabernaemontana	ventricosa	Hochst. ex A.DC.	Tree
Apocynaceae	Voacanga	thouarsii	Roem. & Schult.	Tree
Apocynaceae	Wrightia	natalensis	Stapf	Shrub; Tree
Aquifoliaceae	Ilex	mitis	(L.) Radlk.	Shrub; Tree
Araliaceae	Schefflera	umbellifera	(Sond.) Baill.	Tree
Araliaceae	Seemannaralia	gerrardii	(Seem.) Harms	Tree
Asparagaceae	Asparagus	acocksii	Jessop	Shrub
Asparagaceae	Asparagus	aggregatus	(Oberm.) Fellingham & N.L.Mey.	Shrub
Asparagaceae	Asparagus	aspergillus	Jessop	Shrub
Asparagaceae	Asparagus	bayeri	(Oberm.) Fellingham & N.L.Mey.	Shrub
Asparagaceae	Asparagus	bechuanicus	Baker	Shrub
Asparagaceae	Asparagus	biflorus	(Oberm.) Fellingham & N.L.Mey.	Shrub
Asparagaceae	Asparagus	burchellii	Baker	Shrub
Asparagaceae	Asparagus	capensis	L.	Shrub
Asparagaceae	Asparagus	concinnus	(Baker) Kies	Shrub
Asparagaceae	Asparagus	denudatus	(Kunth) Baker	Shrub
Asparagaceae	Asparagus	divaricatus	(Oberm.) Fellingham & N.L.Mey.	Shrub
Asparagaceae	Asparagus	elephantinus	S.M.Burrows	Shrub
Asparagaceae	Asparagus	exsertus	(Oberm.) Fellingham & N.L.Mey.	Shrub
Asparagaceae	Asparagus	exuvialis	Burch.	Shrub
Asparagaceae	Asparagus	flavicaulis	(Oberm.) Fellingham & N.L.Mey.	Shrub
Asparagaceae	Asparagus	fouriei	(Oberm.) Fellingham & N.L.Mey.	Shrub
Asparagaceae	Asparagus	glaucus	Kies	Shrub
Asparagaceae	Asparagus	graniticus	(Oberm.) Fellingham & N.L.Mey.	Shrub
Asparagaceae	Asparagus	intricatus	(Oberm.) Fellingham & N.L.Mey.	Shrub
Asparagaceae	Asparagus	laricinus	Burch.	Shrub
Asparagaceae	Asparagus	macowanii	Baker	Shrub
Asparagaceae	Asparagus	mariae	(Oberm.) Fellingham & N.L.Mey.	Shrub
Asparagaceae	Asparagus	microraphis	(Kunth) Baker	Shrub
Asparagaceae	Asparagus	minutiflorus	(Kunth) Baker	Shrub
Asparagaceae	Asparagus	mucronatus	Jessop	Shrub
Asparagaceae	Asparagus	multiflorus	Baker	Climber; Shrub
Asparagaceae	Asparagus	nelsii	Schinz	Shrub
Asparagaceae	Asparagus	nodulosus	(Oberm.) J.-P.Lebrun & Stork	Shrub
Asparagaceae	Asparagus	oliveri	(Oberm.) Fellingham & N.L.Mey.	Shrub
Asparagaceae	Asparagus	oxyacanthus	Baker	Shrub
Asparagaceae	Asparagus	racemosus	Willd.	Climber; Shrub
Asparagaceae	Asparagus	recurvispinus	(Oberm.) Fellingham & N.L.Mey.	Shrub
Asparagaceae	Asparagus	rigidus	Jessop	Shrub
Asparagaceae	Asparagus	schroederi	Engl.	Shrub
Asparagaceae	Asparagus	sekukuniensis	(Oberm.) Fellingham & N.L.Mey.	Shrub
Asparagaceae	Asparagus	setaceus	(Kunth) Jessop	Shrub
Asparagaceae	Asparagus	spinescens	Steud. ex Roem. & Schult.	Shrub
Asparagaceae	Asparagus	stipulaceus	Lam.	Shrub
Asparagaceae	Asparagus	suaveolens	Burch.	Shrub
Asparagaceae	Asparagus	subulatus	Thunb.	Shrub
Asparagaceae	Asparagus	transvaalensis	(Oberm.) Fellingham & N.L.Mey.	Shrub
Asparagaceae	Asparagus	virgatus	Baker	Shrub
Asteraceae	Amellus	asteroides	(L.) Druce	Shrub
Asteraceae	Amphiglossa	callunoides	DC.	Shrub
Asteraceae	Amphiglossa	corrudifolia	DC.	Shrub
Asteraceae	Amphiglossa	rudolphii	Koekemoer	Shrub
Asteraceae	Amphiglossa	tecta	(Brusse) Koekemoer	Shrub
Asteraceae	Anderbergia	rooibergensis	B.Nord.	Shrub
Asteraceae	Anisochaeta	mikanioides	DC.	Climber; Shrub
Asteraceae	Anisopappus	junodii	Hutch.	Shrub
Asteraceae	Anisopappus	smutsii	Hutch.	Shrub
Asteraceae	Arrowsmithia	corymbosa	(M.D.Hend.) N.G.Bergh	Shrub
Asteraceae	Arrowsmithia	deflexa	(Hilliard & B.L.Burtt) N.G.Bergh	Shrub
Asteraceae	Arrowsmithia	hamata	(Hilliard & B.L.Burtt) N.G.Bergh	Shrub
Asteraceae	Arrowsmithia	revoluta	(Oliv.) N.G.Bergh	Shrub
Asteraceae	Arrowsmithia	tenuifolia	(M.D.Hend.) N.G.Bergh	Shrub
Asteraceae	Athanasia	adenantha	(Harv.) Kallersjo	Shrub
Asteraceae	Athanasia	calophylla	Kallersjo	Shrub
Asteraceae	Athanasia	capitata	(L.) L.	Shrub
Asteraceae	Athanasia	cochlearifolia	Kallersjo	Shrub
Asteraceae	Athanasia	crenata	(L.) L.	Shrub
Asteraceae	Athanasia	crithmifolia	(L.) L.	Shrub
Asteraceae	Athanasia	cuneifolia	Lam.	Shrub
Asteraceae	Athanasia	dentata	(L.) L.	Shrub
Asteraceae	Athanasia	filiformis	L.f.	Shrub
Asteraceae	Athanasia	flexuosa	Thunb.	Shrub
Asteraceae	Athanasia	grandiceps	Hilliard & B.L.Burtt	Shrub
Asteraceae	Athanasia	hirsuta	Thunb.	Shrub
Asteraceae	Athanasia	humilis	Kallersjo	Shrub
Asteraceae	Athanasia	imbricata	Harv.	Shrub
Asteraceae	Athanasia	inopinata	(Hutch.) Kallersjo	Shrub
Asteraceae	Athanasia	juncea	(DC.) D.Dietr.	Shrub
Asteraceae	Athanasia	leptocephala	Kallersjo	Shrub
Asteraceae	Athanasia	linifolia	Burm.f.	Shrub
Asteraceae	Athanasia	microcephala	(DC.) D.Dietr.	Shrub
Asteraceae	Athanasia	oocephala	(DC.) Kallersjo	Shrub
Asteraceae	Athanasia	pectinata	L.f.	Shrub
Asteraceae	Athanasia	pinnata	L.f.	Shrub
Asteraceae	Athanasia	pubescens	(L.) L.	Shrub
Asteraceae	Athanasia	quinquedentata	Thunb.	Shrub
Asteraceae	Athanasia	rugulosa	E.Mey. ex DC.	Shrub
Asteraceae	Athanasia	scabra	Thunb.	Shrub
Asteraceae	Athanasia	sertulifera	DC.	Shrub
Asteraceae	Athanasia	spathulata	(DC.) D.Dietr.	Shrub
Asteraceae	Athanasia	tomentosa	Thunb.	Shrub
Asteraceae	Athanasia	trifurcata	(L.) L.	Shrub
Asteraceae	Athanasia	vestita	(Thunb.) Druce	Shrub
Asteraceae	Athanasia	virgata	Jacq.	Shrub
Asteraceae	Athanasia	viridis	Kallersjo	Shrub
Asteraceae	Athrixia	phylicoides	DC.	Shrub
Asteraceae	Berkheya	angusta	Schltr.	Shrub
Asteraceae	Berkheya	canescens	DC.	Shrub
Asteraceae	Berkheya	cardopatifolia	(DC.) Roessler	Shrub
Asteraceae	Berkheya	carlinifolia	(DC.) Roessler	Shrub
Asteraceae	Berkheya	carlinopsis	Welw. ex O.Hoffm.	Shrub
Asteraceae	Berkheya	chamaepeuce	(S.Moore) Roessler	Shrub
Asteraceae	Berkheya	cruciata	(Houtt.) Willd.	Shrub
Asteraceae	Berkheya	draco	Roessler	Shrub
Asteraceae	Berkheya	ferox	O.Hoffm.	Shrub
Asteraceae	Berkheya	fruticosa	(L.) Ehrh.	Shrub
Asteraceae	Berkheya	mackenii	(Harv.) Roessler	Shrub
Asteraceae	Berkheya	pauciflora	Roessler	Shrub
Asteraceae	Berkheya	rosulata	Roessler	Shrub
Asteraceae	Berkheya	spinosa	(L.f.) Druce	Shrub
Asteraceae	Berkheya	spinosissima	(Thunb.) Willd.	Shrub
Asteraceae	Berkheya	tysonii	Hutch.	Shrub
Asteraceae	Brachylaena	discolor	DC.	Shrub; Tree
Asteraceae	Brachylaena	elliptica	(Thunb.) DC.	Shrub; Tree
Asteraceae	Brachylaena	glabra	(L.f.) Druce	Shrub; Tree
Asteraceae	Brachylaena	huillensis	O.Hoffm.	Shrub; Tree
Asteraceae	Brachylaena	ilicifolia	(Lam.) E.Phillips & Schweick.	Shrub; Tree
Asteraceae	Brachylaena	neriifolia	(L.) R.Br.	Shrub; Tree
Asteraceae	Brachylaena	rotundata	S.Moore	Shrub; Tree
Asteraceae	Brachylaena	transvaalensis	E.Phillips & Schweick.	Tree
Asteraceae	Brachylaena	uniflora	Harv.	Tree
Asteraceae	Callilepis	caerulea	(Hutch.) Leins	Shrub; Tree
Asteraceae	Calotesta	alba	P.O.Karis	Shrub
Asteraceae	Chrysocoma	ciliata	L.	Shrub
Asteraceae	Chrysocoma	longifolia	DC.	Shrub
Asteraceae	Chrysocoma	mozambicensis	Ehr.Bayer	Shrub
Asteraceae	Chrysocoma	obtusata	(Thunb.) Ehr.Bayer	Shrub
Asteraceae	Cineraria	austrotransvaalensis	Cron	Shrub
Asteraceae	Conyza	scabrida	DC.	Shrub
Asteraceae	Cullumia	bisulca	(Thunb.) Less.	Shrub
Asteraceae	Cullumia	carlinoides	DC.	Shrub
Asteraceae	Cullumia	pectinata	(Thunb.) Less.	Shrub
Asteraceae	Cullumia	rigida	DC.	Shrub
Asteraceae	Cymbopappus	adenosolen	(Harv.) B.Nord.	Shrub
Asteraceae	Cymbopappus	hilliardiae	B.Nord.	Shrub
Asteraceae	Dicoma	fruticosa	Compton	Shrub
Asteraceae	Dimorphotheca	cuneata	(Thunb.) Less.	Shrub
Asteraceae	Distephanus	angulifolius	(DC.) H.Rob. & B.Kahn	Climber; Shrub
Asteraceae	Distephanus	anisochaetoides	(Sond.) H.Rob. & B.Kahn	Shrub
Asteraceae	Distephanus	divaricatus	(Steetz) H.Rob. & B.Kahn	Climber; Shrub
Asteraceae	Elytropappus	aridus	Koekemoer	Shrub
Asteraceae	Elytropappus	monticola	Koekemoer	Shrub
Asteraceae	Eriocephalus	africanus	L.	Shrub
Asteraceae	Eriocephalus	ambiguus	(DC.) M.A.N.Mull.	Shrub
Asteraceae	Eriocephalus	aromaticus	C.A.Sm.	Shrub
Asteraceae	Eriocephalus	brevifolius	(DC.) M.A.N.Mull.	Shrub
Asteraceae	Eriocephalus	capitellatus	DC.	Shrub
Asteraceae	Eriocephalus	decussatus	Burch.	Shrub
Asteraceae	Eriocephalus	ericoides	(L.f.) Druce	Shrub
Asteraceae	Eriocephalus	eximius	DC.	Shrub
Asteraceae	Eriocephalus	glandulosus	M.A.N.Mull.	Shrub
Asteraceae	Eriocephalus	grandiflorus	M.A.N.Mull.	Shrub
Asteraceae	Eriocephalus	karooicus	M.A.N.Mull.	Shrub
Asteraceae	Eriocephalus	longifolius	M.A.N.Mull.	Shrub
Asteraceae	Eriocephalus	luederitzianus	O.Hoffm.	Shrub
Asteraceae	Eriocephalus	macroglossus	B.Nord.	Shrub
Asteraceae	Eriocephalus	merxmuelleri	M.A.N.Mull.	Shrub
Asteraceae	Eriocephalus	microcephalus	DC.	Shrub
Asteraceae	Eriocephalus	microphyllus	DC.	Shrub
Asteraceae	Eriocephalus	namaquensis	M.A.N.Mull.	Shrub
Asteraceae	Eriocephalus	pauperrimus	Merxm. & Eberle	Shrub
Asteraceae	Eriocephalus	pedicellaris	DC.	Shrub
Asteraceae	Eriocephalus	punctulatus	DC.	Shrub
Asteraceae	Eriocephalus	purpureus	Burch.	Shrub
Asteraceae	Eriocephalus	racemosus	L.	Shrub
Asteraceae	Eriocephalus	scariosus	DC.	Shrub
Asteraceae	Eriocephalus	spinescens	Burch.	Shrub
Asteraceae	Eriocephalus	tenuifolius	DC.	Shrub
Asteraceae	Eriocephalus	tenuipes	C.A.Sm.	Shrub
Asteraceae	Eumorphia	corymbosa	E.Phillips	Shrub
Asteraceae	Eumorphia	davyi	Bolus	Shrub
Asteraceae	Eumorphia	dregeana	DC.	Shrub
Asteraceae	Eumorphia	prostrata	Bolus	Shrub
Asteraceae	Eumorphia	sericea	J.M.Wood & M.S.Evans	Shrub
Asteraceae	Euryops	abrotanifolius	(L.) DC.	Shrub
Asteraceae	Euryops	acraeus	M.D.Hend.	Shrub
Asteraceae	Euryops	algoensis	DC.	Shrub
Asteraceae	Euryops	annae	E.Phillips	Shrub
Asteraceae	Euryops	asparagoides	(Licht. ex Less.) DC.	Shrub
Asteraceae	Euryops	brachypodus	(DC.) B.Nord.	Shrub
Asteraceae	Euryops	brevilobus	Compton	Shrub
Asteraceae	Euryops	brevipapposus	M.D.Hend.	Shrub
Asteraceae	Euryops	calvescens	DC.	Shrub
Asteraceae	Euryops	chrysanthemoides	(DC.) B.Nord.	Shrub
Asteraceae	Euryops	ciliatus	B.Nord.	Shrub
Asteraceae	Euryops	cuneatus	B.Nord.	Shrub
Asteraceae	Euryops	dentatus	B.Nord.	Shrub
Asteraceae	Euryops	empetrifolius	DC.	Shrub
Asteraceae	Euryops	erectus	(Compton) B.Nord.	Shrub
Asteraceae	Euryops	euryopoides	(DC.) B.Nord.	Shrub
Asteraceae	Euryops	evansii	Schltr.	Shrub
Asteraceae	Euryops	exsudans	B.Nord. & V.R.Clark	Shrub
Asteraceae	Euryops	floribundus	N.E.Br.	Shrub
Asteraceae	Euryops	galpinii	Bolus	Shrub
Asteraceae	Euryops	glutinosus	B.Nord.	Shrub
Asteraceae	Euryops	imbricatus	(Thunb.) DC.	Shrub
Asteraceae	Euryops	indecorus	B.Nord.	Shrub
Asteraceae	Euryops	lateriflorus	(L.f.) DC.	Shrub
Asteraceae	Euryops	latifolius	B.Nord.	Shrub
Asteraceae	Euryops	linearis	Harv.	Shrub
Asteraceae	Euryops	linifolius	(L.) DC.	Shrub
Asteraceae	Euryops	marlothii	B.Nord.	Shrub
Asteraceae	Euryops	mirus	B.Nord.	Shrub
Asteraceae	Euryops	multifidus	(Thunb.) DC.	Shrub
Asteraceae	Euryops	munitus	(L.f.) B.Nord.	Shrub
Asteraceae	Euryops	namibensis	(Merxm.) B.Nord.	Shrub
Asteraceae	Euryops	oligoglossus	DC.	Shrub
Asteraceae	Euryops	othonnoides	(DC.) B.Nord.	Shrub
Asteraceae	Euryops	pectinatus	(L.) Cass.	Shrub
Asteraceae	Euryops	proteoides	B.Nord. & V.R.Clark	Shrub
Asteraceae	Euryops	rehmannii	Compton	Shrub
Asteraceae	Euryops	rosulatus	B.Nord.	Shrub
Asteraceae	Euryops	serra	DC.	Shrub
Asteraceae	Euryops	spathaceus	DC.	Shrub
Asteraceae	Euryops	speciosissimus	DC.	Shrub
Asteraceae	Euryops	subcarnosus	DC.	Shrub
Asteraceae	Euryops	sulcatus	(Thunb.) Less. ex Harv.	Shrub
Asteraceae	Euryops	tagetoides	(DC.) B.Nord.	Shrub
Asteraceae	Euryops	tenuissimus	(L.) DC.	Shrub
Asteraceae	Euryops	thunbergii	B.Nord.	Shrub
Asteraceae	Euryops	trifidus	(L.f.) DC.	Shrub
Asteraceae	Euryops	trilobus	Harv.	Shrub
Asteraceae	Euryops	tysonii	E.Phillips	Shrub
Asteraceae	Euryops	ursinoides	B.Nord.	Shrub
Asteraceae	Euryops	virgineus	(L.f.) DC.	Shrub
Asteraceae	Euryops	wageneri	Compton	Shrub
Asteraceae	Felicia	aculeata	Grau	Shrub
Asteraceae	Felicia	aethiopica	(Burm.f.) Bolus & Wolley-Dod ex Adamson & T.M.Salter	Shrub
Asteraceae	Felicia	brevifolia	(DC.) Grau	Shrub
Asteraceae	Felicia	burkei	(Harv.) L.Bolus	Shrub
Asteraceae	Felicia	canaliculata	Grau	Shrub
Asteraceae	Felicia	clavipilosa	Grau	Shrub
Asteraceae	Felicia	denticulata	Grau	Shrub
Asteraceae	Felicia	deserti	Schltr. ex Grau	Shrub
Asteraceae	Felicia	drakensbergensis	J.M.Wood & M.S.Evans	Shrub
Asteraceae	Felicia	dregei	DC.	Shrub
Asteraceae	Felicia	ebracteata	Grau	Shrub
Asteraceae	Felicia	echinata	(Thunb.) Nees	Shrub
Asteraceae	Felicia	erigeroides	DC.	Shrub
Asteraceae	Felicia	esterhuyseniae	Grau	Shrub
Asteraceae	Felicia	fascicularis	DC.	Shrub
Asteraceae	Felicia	ferulacea	Compton	Shrub
Asteraceae	Felicia	filifolia	(Vent.) Burtt Davy	Shrub
Asteraceae	Felicia	flanaganii	Bolus	Shrub
Asteraceae	Felicia	fruticosa	(L.) G.Nicholson	Shrub
Asteraceae	Felicia	hirsuta	DC.	Shrub
Asteraceae	Felicia	hirta	(Thunb.) Grau	Shrub
Asteraceae	Felicia	hyssopifolia	(P.J.Bergius) Nees	Shrub
Asteraceae	Felicia	joubertinae	Grau	Shrub
Asteraceae	Felicia	lasiocarpa	DC.	Shrub
Asteraceae	Felicia	linifolia	(Harv.) Grau	Shrub
Asteraceae	Felicia	microcephala	Grau	Shrub
Asteraceae	Felicia	muricata	(Thunb.) Nees	Shrub
Asteraceae	Felicia	nordenstamii	Grau	Shrub
Asteraceae	Felicia	odorata	Compton	Shrub
Asteraceae	Felicia	oleosa	Grau	Shrub
Asteraceae	Felicia	ovata	(Thunb.) Compton	Shrub
Asteraceae	Felicia	rogersii	S.Moore	Shrub
Asteraceae	Felicia	scabrida	(DC.) Range	Shrub
Asteraceae	Felicia	tsitsikamae	Grau	Shrub
Asteraceae	Felicia	venusta	S.Moore	Shrub
Asteraceae	Felicia	westae	(Fourc.) Grau	Shrub
Asteraceae	Felicia	whitehillensis	Compton	Shrub
Asteraceae	Felicia	zeyheri	(Less.) Nees	Shrub
Asteraceae	Garuleum	album	S.Moore	Shrub
Asteraceae	Garuleum	tanacetifolium	(MacOwan) Norl.	Shrub
Asteraceae	Geigeria	brevifolia	(DC.) Harv.	Shrub
Asteraceae	Gymnanthemum	amygdalinum	(Delile) Sch.Bip. ex Walp.	Shrub; Tree
Asteraceae	Gymnanthemum	crataegifolium	(Hutch.) H.Rob.	Shrub
Asteraceae	Gymnopentzia	bifurcata	Benth.	Shrub
Asteraceae	Helichrysum	bachmannii	Klatt	Shrub
Asteraceae	Helichrysum	citricephalum	Hilliard & B.L.Burtt	Shrub
Asteraceae	Helichrysum	edwardsii	Wild	Shrub
Asteraceae	Helichrysum	hebelepis	DC.	Shrub
Asteraceae	Helichrysum	junodii	Moeser	Shrub
Asteraceae	Helichrysum	kraussii	Sch.Bip.	Shrub
Asteraceae	Helichrysum	lambertianum	DC.	Shrub
Asteraceae	Helichrysum	milleri	Hilliard	Shrub
Asteraceae	Helichrysum	montis-cati	Hilliard	Shrub
Asteraceae	Helichrysum	populifolium	DC.	Shrub
Asteraceae	Helichrysum	rudolfii	Hilliard	Shrub
Asteraceae	Helichrysum	scabrum	(Thunb.) Less.	Shrub
Asteraceae	Helichrysum	summo-montanum	I.Verd.	Shrub
Asteraceae	Helichrysum	tenuifolium	Killick	Shrub
Asteraceae	Helichrysum	transmontanum	Hilliard	Shrub
Asteraceae	Helichrysum	tricostatum	(Thunb.) Less.	Shrub
Asteraceae	Hertia	kraussii	(Sch.Bip.) Fourc.	Shrub
Asteraceae	Hoplophyllum	ferox	Sond.	Shrub
Asteraceae	Hoplophyllum	spinosum	DC.	Shrub
Asteraceae	Hymenolepis	cynopus	K.Bremer & Kallersjo	Shrub
Asteraceae	Hymenolepis	dentata	(DC.) Kallersjo	Shrub
Asteraceae	Hymenolepis	gnidioides	(S.Moore) Kallersjo	Shrub
Asteraceae	Hymenolepis	incisa	DC.	Shrub
Asteraceae	Hymenolepis	indivisa	(Harv.) Kallersjo	Shrub
Asteraceae	Hymenolepis	speciosa	(Hutch.) Kallersjo	Shrub
Asteraceae	Inulanthera	calva	(Hutch.) Kallersjo	Shrub
Asteraceae	Inulanthera	dregeana	(DC.) Kallersjo	Shrub
Asteraceae	Inulanthera	leucoclada	(DC.) Kallersjo	Shrub
Asteraceae	Inulanthera	montana	(J.M.Wood) Kallersjo	Shrub
Asteraceae	Inulanthera	thodei	(Bolus) Kallersjo	Shrub
Asteraceae	Lachnospermum	fasciculatum	(Thunb.) Baill.	Shrub
Asteraceae	Lachnospermum	imbricatum	(P.J.Bergius) Hilliard	Shrub
Asteraceae	Lachnospermum	neglectum	Schltr. ex J.C.Manning & Goldblatt	Shrub
Asteraceae	Lachnospermum	umbellatum	(L.f.) Pillans	Shrub
Asteraceae	Langebergia	canescens	(DC.) Anderb.	Shrub
Asteraceae	Lopholaena	festiva	Brusse	Shrub
Asteraceae	Lopholaena	longipes	(Harv.) Thell.	Shrub
Asteraceae	Lopholaena	platyphylla	Benth.	Shrub
Asteraceae	Marasmodes	crewiana	Magee & Ebrahim	Shrub
Asteraceae	Marasmodes	defoliata	S.Ortiz	Shrub
Asteraceae	Marasmodes	dummeri	Bolus ex Hutch.	Shrub
Asteraceae	Marasmodes	fasciculata	S.Ortiz	Shrub
Asteraceae	Marasmodes	macrocephala	S.Ortiz	Shrub
Asteraceae	Marasmodes	oligocephala	DC.	Shrub
Asteraceae	Marasmodes	oppositifolia	Magee & R.Koopman	Shrub
Asteraceae	Marasmodes	oubinae	S.Ortiz	Shrub
Asteraceae	Marasmodes	polycephala	DC.	Shrub
Asteraceae	Marasmodes	reflexa	S.Ortiz	Shrub
Asteraceae	Marasmodes	spinosa	S.Ortiz	Shrub
Asteraceae	Marasmodes	trifida	S.Ortiz	Shrub
Asteraceae	Marasmodes	undulata	Compton	Shrub
Asteraceae	Metalasia	agathosmoides	Pillans	Shrub
Asteraceae	Metalasia	albescens	P.O.Karis	Shrub
Asteraceae	Metalasia	alfredii	Pillans	Shrub
Asteraceae	Metalasia	aurea	D.Don	Shrub
Asteraceae	Metalasia	calcicola	P.O.Karis	Shrub
Asteraceae	Metalasia	capitata	(Lam.) Less.	Shrub
Asteraceae	Metalasia	cephalotes	(Thunb.) Less.	Shrub
Asteraceae	Metalasia	compacta	Zeyh. ex Sch.Bip.	Shrub
Asteraceae	Metalasia	densa	(Lam.) P.O.Karis	Shrub
Asteraceae	Metalasia	distans	(Schrank) DC.	Shrub
Asteraceae	Metalasia	divergens	(Thunb.) D.Don	Shrub
Asteraceae	Metalasia	dregeana	DC.	Shrub
Asteraceae	Metalasia	fastigiata	(Thunb.) D.Don	Shrub
Asteraceae	Metalasia	galpinii	L.Bolus	Shrub
Asteraceae	Metalasia	lichtensteinii	Less.	Shrub
Asteraceae	Metalasia	luteola	P.O.Karis	Shrub
Asteraceae	Metalasia	massonii	S.Moore	Shrub
Asteraceae	Metalasia	muraltiifolia	DC.	Shrub
Asteraceae	Metalasia	muricata	(L.) D.Don	Shrub
Asteraceae	Metalasia	namaquana	P.O.Karis & Helme	Shrub
Asteraceae	Metalasia	pallida	Bolus	Shrub
Asteraceae	Metalasia	plicata	P.O.Karis	Shrub
Asteraceae	Metalasia	pulcherrima	Less.	Shrub
Asteraceae	Metalasia	pungens	D.Don	Shrub
Asteraceae	Metalasia	riparia	T.M.Salter	Shrub
Asteraceae	Metalasia	tricolor	Pillans	Shrub
Asteraceae	Metalasia	trivialis	P.O.Karis	Shrub
Asteraceae	Metalasia	umbelliformis	P.O.Karis	Shrub
Asteraceae	Microglossa	caffrorum	(Less.) Grau	Shrub
Asteraceae	Microglossa	mespilifolia	(Less.) B.L.Rob.	Shrub
Asteraceae	Myrovernix	glandulosus	Koekemoer	Shrub
Asteraceae	Myrovernix	gnaphaloides	Koekemoer	Shrub
Asteraceae	Myrovernix	intricata	(Levyns) Koekemoer	Shrub
Asteraceae	Oedera	acerosa	(DC.) N.G.Bergh	Shrub
Asteraceae	Oedera	calycina	(L.f.) N.G.Bergh	Shrub
Asteraceae	Oedera	capensis	(L.) Druce	Shrub
Asteraceae	Oedera	epaleacea	Beyers	Shrub
Asteraceae	Oedera	flavicoma	(DC.) N.G.Bergh	Shrub
Asteraceae	Oedera	genistifolia	(L.) Anderb. & K.Bremer	Shrub
Asteraceae	Oedera	glandulosa	(Thunb.) N.G.Bergh	Shrub
Asteraceae	Oedera	hirta	Thunb.	Shrub
Asteraceae	Oedera	humilis	(Less.) N.G.Bergh	Shrub
Asteraceae	Oedera	imbricata	Lam.	Shrub
Asteraceae	Oedera	laevis	DC.	Shrub
Asteraceae	Oedera	multipunctata	(DC.) Anderb. & K.Bremer	Shrub
Asteraceae	Oedera	oppositifolia	(DC.) N.G.Bergh	Shrub
Asteraceae	Oedera	resinifera	(K.Bremer) Anderb. & K.Bremer	Shrub
Asteraceae	Oedera	speciosa	(DC.) N.G.Bergh	Shrub
Asteraceae	Oedera	spinescens	(DC.) N.G.Bergh	Shrub
Asteraceae	Oedera	squarrosa	(L.) Anderb. & K.Bremer	Shrub
Asteraceae	Oedera	uniflora	(L.f.) Anderb. & K.Bremer	Shrub
Asteraceae	Oldenburgia	grandis	(Thunb.) Baill.	Shrub; Tree
Asteraceae	Oncosiphon	schlechteri	(Bolus) Kallersjo	Shrub
Asteraceae	Osmitopsis	asteriscoides	(P.J.Bergius) Less.	Shrub
Asteraceae	Osteospermum	aciphyllum	DC.	Shrub
Asteraceae	Osteospermum	armatum	Norl.	Shrub
Asteraceae	Osteospermum	auriculatum	(S.Moore) Norl.	Shrub
Asteraceae	Osteospermum	australe	B.Nord.	Shrub
Asteraceae	Osteospermum	ciliatum	P.J.Bergius	Shrub
Asteraceae	Osteospermum	glabrum	N.E.Br.	Shrub
Asteraceae	Osteospermum	hafstroemii	Norl.	Shrub
Asteraceae	Osteospermum	karrooicum	(Bolus) Norl.	Shrub
Asteraceae	Osteospermum	lanceolatum	DC.	Shrub
Asteraceae	Osteospermum	leptolobum	(Harv.) Norl.	Shrub
Asteraceae	Osteospermum	microphyllum	DC.	Shrub
Asteraceae	Osteospermum	oppositifolium	(Aiton) Norl.	Shrub
Asteraceae	Osteospermum	sinuatum	(DC.) Norl.	Shrub
Asteraceae	Osteospermum	spinescens	Thunb.	Shrub
Asteraceae	Osteospermum	spinosum	L.	Shrub
Asteraceae	Osteospermum	subulatum	DC.	Shrub
Asteraceae	Othonna	divaricata	Hutch.	Shrub
Asteraceae	Othonna	leptodactyla	Harv.	Shrub
Asteraceae	Othonna	spinescens	DC.	Shrub
Asteraceae	Othonna	trinervia	DC.	Shrub
Asteraceae	Pechuel-Loeschea	leubnitziae	(Kuntze) O.Hoffm.	Shrub
Asteraceae	Pegolettia	baccharidifolia	Less.	Shrub
Asteraceae	Pegolettia	gariepina	Anderb.	Shrub
Asteraceae	Pentatrichia	alata	S.Moore	Shrub
Asteraceae	Pentatrichia	petrosa	Klatt	Shrub
Asteraceae	Pentzia	argentea	Hutch.	Shrub
Asteraceae	Pentzia	cooperi	Harv.	Shrub
Asteraceae	Pentzia	dentata	(L.) Kuntze	Shrub
Asteraceae	Pentzia	elegans	DC.	Shrub
Asteraceae	Pentzia	globosa	Less.	Shrub
Asteraceae	Pentzia	incana	(Thunb.) Kuntze	Shrub
Asteraceae	Pentzia	lanata	Hutch.	Shrub
Asteraceae	Pentzia	pinnatisecta	Hutch.	Shrub
Asteraceae	Pentzia	punctata	Harv. ex Hutch.	Shrub
Asteraceae	Pentzia	quinquefida	(Thunb.) Less.	Shrub
Asteraceae	Pentzia	sphaerocephala	DC.	Shrub
Asteraceae	Pentzia	spinescens	Less.	Shrub
Asteraceae	Petalacte	coronata	(L.) D.Don	Shrub
Asteraceae	Phaenocoma	prolifera	(L.) D.Don	Shrub
Asteraceae	Phymaspermum	acerosum	(DC.) Kallersjo	Shrub
Asteraceae	Phymaspermum	aciculare	(E.Mey. ex DC.) Benth. & Hook. ex B.D.Jacks.	Shrub
Asteraceae	Phymaspermum	aphyllum	Magee & Ruiters	Shrub
Asteraceae	Phymaspermum	appressum	Bolus	Shrub
Asteraceae	Phymaspermum	athanasioides	(S.Moore) Kallersjo	Shrub
Asteraceae	Phymaspermum	leptophyllum	(DC.) Benth. & Hook. ex B.D.Jacks.	Shrub
Asteraceae	Phymaspermum	oppositifolium	Magee & Ruiters	Shrub
Asteraceae	Phymaspermum	peglerae	(Hutch.) Kallersjo	Shrub
Asteraceae	Phymaspermum	scoparium	(DC.) Kallersjo	Shrub
Asteraceae	Phymaspermum	thymelaeoides	(DC.) Magee & Ruiters	Shrub
Asteraceae	Phymaspermum	trifidum	Magee & Ruiters	Shrub
Asteraceae	Pluchea	bojeri	(DC.) Humbert	Shrub
Asteraceae	Polyarrhena	reflexa	(L.) Cass.	Shrub
Asteraceae	Polyarrhena	stricta	Grau	Shrub
Asteraceae	Printzia	auriculata	Harv.	Shrub
Asteraceae	Printzia	huttoni	Harv.	Shrub
Asteraceae	Printzia	polifolia	(L.) Hutch.	Shrub
Asteraceae	Printzia	pyrifolia	Less.	Shrub
Asteraceae	Psiadia	punctulata	(DC.) Vatke	Shrub
Asteraceae	Pteronia	acuminata	DC.	Shrub
Asteraceae	Pteronia	acuta	Muschl.	Shrub
Asteraceae	Pteronia	adenocarpa	Harv.	Shrub
Asteraceae	Pteronia	adhaerens	Compton	Shrub
Asteraceae	Pteronia	ambrariifolia	Schltr.	Shrub
Asteraceae	Pteronia	armatifolia	A.Bello, Magee & Boatwr.	Shrub
Asteraceae	Pteronia	aspalatha	DC.	Shrub
Asteraceae	Pteronia	aspera	Thunb.	Shrub
Asteraceae	Pteronia	beckeoides	DC.	Shrub
Asteraceae	Pteronia	bolusii	E.Phillips	Shrub
Asteraceae	Pteronia	camphorata	(L.) L.	Shrub
Asteraceae	Pteronia	cederbergensis	A.Bello, Magee & Boatwr.	Shrub
Asteraceae	Pteronia	centauroides	DC.	Shrub
Asteraceae	Pteronia	ciliata	Thunb.	Shrub
Asteraceae	Pteronia	cylindracea	DC.	Shrub
Asteraceae	Pteronia	decurrens	A.Bello, Magee & Boatwr.	Shrub
Asteraceae	Pteronia	diosmifolia	Brusse	Shrub
Asteraceae	Pteronia	divaricata	(P.J.Bergius) Less.	Shrub
Asteraceae	Pteronia	elata	B.Nord.	Shrub
Asteraceae	Pteronia	elongata	Thunb.	Shrub
Asteraceae	Pteronia	empetrifolia	DC.	Shrub
Asteraceae	Pteronia	erythrochaeta	DC.	Shrub
Asteraceae	Pteronia	fasciculata	L.f.	Shrub
Asteraceae	Pteronia	fastigiata	Thunb.	Shrub
Asteraceae	Pteronia	flava	A.Bello, Magee & Boatwr.	Shrub
Asteraceae	Pteronia	foleyi	Hutch. & E.Phillips	Shrub
Asteraceae	Pteronia	glandulosa	A.Bello, Magee & Boatwr.	Shrub
Asteraceae	Pteronia	glauca	Thunb.	Shrub
Asteraceae	Pteronia	glaucescens	DC.	Shrub
Asteraceae	Pteronia	glomerata	L.f.	Shrub
Asteraceae	Pteronia	gymnocline	DC.	Shrub
Asteraceae	Pteronia	hutchinsoniana	Compton	Shrub
Asteraceae	Pteronia	incana	(Burm.) DC.	Shrub
Asteraceae	Pteronia	inflexa	Thunb. ex L.f.	Shrub
Asteraceae	Pteronia	intermedia	Hutch. & E.Phillips	Shrub
Asteraceae	Pteronia	leptospermoides	DC.	Shrub
Asteraceae	Pteronia	leucoclada	Turcz.	Shrub
Asteraceae	Pteronia	leucoloma	DC.	Shrub
Asteraceae	Pteronia	lucilioides	DC.	Shrub
Asteraceae	Pteronia	membranacea	L.f.	Shrub
Asteraceae	Pteronia	mooreiana	Hutch.	Shrub
Asteraceae	Pteronia	mucronata	DC.	Shrub
Asteraceae	Pteronia	oblanceolata	E.Phillips	Shrub
Asteraceae	Pteronia	onobromoides	DC.	Shrub
Asteraceae	Pteronia	oppositifolia	L.	Shrub
Asteraceae	Pteronia	ovalifolia	DC.	Shrub
Asteraceae	Pteronia	pallens	L.f.	Shrub
Asteraceae	Pteronia	punctata	E.Phillips	Shrub
Asteraceae	Pteronia	rangei	Muschl.	Shrub
Asteraceae	Pteronia	scariosa	L.f.	Shrub
Asteraceae	Pteronia	stoehelinoides	DC.	Shrub
Asteraceae	Pteronia	teretifolia	(Thunb.) Fourc.	Shrub
Asteraceae	Pteronia	tricephala	DC.	Shrub
Asteraceae	Pteronia	uncinata	DC.	Shrub
Asteraceae	Pteronia	undulata	DC.	Shrub
Asteraceae	Pteronia	unguiculata	S.Moore	Shrub
Asteraceae	Pteronia	villosa	L.f.	Shrub
Asteraceae	Schistostephium	flabelliforme	Less.	Shrub
Asteraceae	Schistostephium	hippiifolium	(DC.) Hutch.	Shrub
Asteraceae	Schistostephium	rotundifolium	(DC.) Fenzl ex Harv.	Shrub
Asteraceae	Schistostephium	umbellatum	(L.f.) K.Bremer & Humphries	Shrub
Asteraceae	Senecio	coleophyllus	Turcz.	Shrub
Asteraceae	Senecio	cornu-cervi	MacOwan	Shrub
Asteraceae	Senecio	dissidens	Fourc.	Shrub
Asteraceae	Senecio	dumosus	Fourc.	Shrub
Asteraceae	Senecio	euryopoides	DC.	Shrub
Asteraceae	Senecio	halimifolius	L.	Shrub
Asteraceae	Senecio	hollandii	Compton	Shrub
Asteraceae	Senecio	lanceus	Aiton	Shrub
Asteraceae	Senecio	rigidus	L.	Shrub
Asteraceae	Seriphium	cinereum	L.	Shrub
Asteraceae	Seriphium	incanum	(Thunb.) Pers.	Shrub
Asteraceae	Seriphium	plumosum	L.	Shrub
Asteraceae	Seriphium	saxatilis	(Levyns) Koekemoer	Shrub
Asteraceae	Seriphium	spirale	(Less.) Koekemoer	Shrub
Asteraceae	Stoebe	aethiopica	L.	Shrub
Asteraceae	Stoebe	alopecuroides	(Lam.) Less.	Shrub
Asteraceae	Stoebe	cyathuloides	Schltr.	Shrub
Asteraceae	Stoebe	gomphrenoides	(Lam.) P.J.Bergius	Shrub
Asteraceae	Stoebe	leucocephala	DC.	Shrub
Asteraceae	Stoebe	microphylla	DC.	Shrub
Asteraceae	Stoebe	muirii	Levyns	Shrub
Asteraceae	Stoebe	rosea	Wolley-Dod	Shrub
Asteraceae	Syncarpha	eximia	(L.) B.Nord.	Shrub
Asteraceae	Syncarpha	milleflora	(L.f.) B.Nord.	Shrub
Asteraceae	Syncarpha	speciosissima	(L.) B.Nord.	Shrub
Asteraceae	Tarchonanthus	camphoratus	L.	Shrub; Tree
Asteraceae	Tarchonanthus	littoralis	P.P.J.Herman	Shrub; Tree
Asteraceae	Tarchonanthus	minor	Less.	Shrub; Tree
Asteraceae	Tarchonanthus	obovatus	DC.	Shrub; Tree
Asteraceae	Tarchonanthus	parvicapitulatus	P.P.J.Herman	Shrub; Tree
Asteraceae	Tarchonanthus	trilobus	DC.	Shrub; Tree
Asteraceae	Ursinia	anethoides	(DC.) N.E.Br.	Shrub
Asteraceae	Ursinia	caledonica	(E.Phillips) Prassler	Shrub
Asteraceae	Ursinia	eckloniana	(Sond.) N.E.Br.	Shrub
Asteraceae	Ursinia	frutescens	Dinter	Shrub
Asteraceae	Ursinia	paleacea	(L.) Moench	Shrub
Asteraceae	Ursinia	pinnata	(Thunb.) Prassler	Shrub
Asteraceae	Ursinia	quinquepartita	(DC.) N.E.Br.	Shrub
Asteraceae	Ursinia	trifida	(Thunb.) N.E.Br.	Shrub
Asteraceae	Zoutpansbergia	caerulea	Hutch.	Shrub; Tree
Asteraceae	Zyrphelis	nervosa	Zinnecker	Shrub
Bignoniaceae	Catophractes	alexandri	D.Don	Shrub; Tree
Bignoniaceae	Markhamia	obtusifolia	(Baker) Sprague	Shrub; Tree
Bignoniaceae	Markhamia	zanzibarica	(Bojer ex DC.) K.Schum.	Shrub; Tree
Bignoniaceae	Rhigozum	brevispinosum	Kuntze	Shrub
Bignoniaceae	Rhigozum	obovatum	Burch.	Shrub; Tree
Bignoniaceae	Rhigozum	trichotomum	Burch.	Shrub
Bignoniaceae	Rhigozum	zambesiacum	Baker	Shrub; Tree
Bignoniaceae	Tecomaria	capensis	(Thunb.) Spach	Shrub
Boraginaceae	Cordia	africana	Lam.	Tree
Boraginaceae	Cordia	caffra	Sond.	Shrub; Tree
Boraginaceae	Cordia	grandicalyx	Oberm.	Shrub; Tree
Boraginaceae	Cordia	monoica	Roxb.	Shrub; Tree
Boraginaceae	Cordia	ovalis	R.Br. ex DC.	Shrub; Tree
Boraginaceae	Cordia	quercifolia	Klotzsch	Tree
Boraginaceae	Cordia	sinensis	Lam.	Tree; Shrub
Boraginaceae	Ehretia	alba	Retief & A.E.van Wyk	Shrub
Boraginaceae	Ehretia	amoena	Klotzsch	Shrub; Tree
Boraginaceae	Ehretia	rigida	(Thunb.) Druce	Tree; Shrub
Boraginaceae	Heliotropium	hereroense	Schinz	Shrub
Boraginaceae	Lobostemon	argenteus	(P.J.Bergius) H.Buek	Shrub
Boraginaceae	Lobostemon	belliformis	Buys	Shrub
Boraginaceae	Lobostemon	collinus	Schltr. ex C.H.Wright	Shrub
Boraginaceae	Lobostemon	daltonii	Buys	Shrub
Boraginaceae	Lobostemon	decorus	Levyns	Shrub
Boraginaceae	Lobostemon	echioides	Lehm.	Shrub
Boraginaceae	Lobostemon	fruticosus	(L.) H.Buek	Shrub
Boraginaceae	Lobostemon	glaucophyllus	(Jacq.) H.Buek	Shrub
Boraginaceae	Lobostemon	gracilis	Levyns	Shrub
Boraginaceae	Lobostemon	horridus	Levyns	Shrub
Boraginaceae	Lobostemon	laevigatus	(L.) H.Buek	Shrub
Boraginaceae	Lobostemon	marlothii	Levyns	Shrub
Boraginaceae	Lobostemon	montanus	H.Buek	Shrub
Boraginaceae	Lobostemon	muirii	Levyns	Shrub
Boraginaceae	Lobostemon	oederiaefolius	A.DC.	Shrub
Boraginaceae	Lobostemon	paniculatus	(Thunb.) H.Buek	Shrub
Boraginaceae	Lobostemon	paniculiformis	DC. & A.DC.	Shrub
Boraginaceae	Lobostemon	regulariflorus	(Ker Gawl.) Buys	Shrub
Boraginaceae	Lobostemon	sanguineus	Schltr.	Shrub
Boraginaceae	Lobostemon	stachydeus	DC. & A.DC.	Shrub
Boraginaceae	Lobostemon	strigosus	(Lehm.) H.Buek	Shrub
Boraginaceae	Lobostemon	trichotomus	(Thunb.) DC.	Shrub
Boraginaceae	Lobostemon	trigonus	(Thunb.) H.Buek	Shrub
Brassicaceae	Heliophila	callosa	(L.f.) DC.	Shrub
Brassicaceae	Heliophila	cornuta	Sond.	Shrub
Brassicaceae	Heliophila	cuneata	Marais	Shrub
Brassicaceae	Heliophila	elata	Sond.	Shrub
Brassicaceae	Heliophila	hurkana	Al-Shehbaz & Mumm.	Shrub
Brassicaceae	Heliophila	macra	Schltr.	Shrub
Brassicaceae	Heliophila	macrosperma	Burch. ex DC.	Shrub
Brassicaceae	Heliophila	polygaloides	Schltr.	Shrub
Brassicaceae	Heliophila	scoparia	Burch. ex DC.	Shrub
Bruniaceae	Berzelia	abrotanoides	(L.) Brongn.	Shrub
Bruniaceae	Berzelia	albiflora	(E.Phillips) Class.-Bockh. & E.G.H.Oliv.	Shrub
Bruniaceae	Berzelia	alopecuroides	(Thunb.) Sond.	Shrub
Bruniaceae	Berzelia	arachnoidea	(J.C.Wendl.) Eckl. & Zeyh.	Shrub
Bruniaceae	Berzelia	burchellii	Dummer	Shrub
Bruniaceae	Berzelia	commutata	Sond.	Shrub
Bruniaceae	Berzelia	cordifolia	Schltdl.	Shrub
Bruniaceae	Berzelia	dregeana	Colozza	Shrub
Bruniaceae	Berzelia	ecklonii	Pillans	Shrub
Bruniaceae	Berzelia	galpinii	Pillans	Shrub
Bruniaceae	Berzelia	incurva	Pillans	Shrub
Bruniaceae	Berzelia	intermedia	(D.Dietr.) Schltdl.	Shrub
Bruniaceae	Berzelia	lanuginosa	(L.) Brongn.	Shrub
Bruniaceae	Berzelia	rubra	(Willd.) Schltdl.	Shrub
Bruniaceae	Berzelia	squarrosa	(Thunb.) Sond.	Shrub
Bruniaceae	Brunia	africana	(Burm.f.) Class.-Bockh. & E.G.H.Oliv.	Shrub
Bruniaceae	Brunia	compacta	A.V.Hall	Shrub
Bruniaceae	Brunia	cordata	(Burm.f.) Class.-Bockh. & E.G.H.Oliv.	Shrub
Bruniaceae	Brunia	dregeana	(Sond.) Class.-Bockh. & E.G.H.Oliv.	Shrub
Bruniaceae	Brunia	laevis	Thunb.	Shrub
Bruniaceae	Brunia	latebracteata	A.V.Hall	Shrub
Bruniaceae	Brunia	macrocephala	Willd.	Shrub
Bruniaceae	Brunia	monostyla	(Pillans) Class.-Bockh. & E.G.H.Oliv.	Shrub
Bruniaceae	Brunia	neglecta	Schltr.	Shrub
Bruniaceae	Brunia	palustris	(Schltr. ex Dummer) Class.-Bockh. & E.G.H.Oliv.	Shrub
Bruniaceae	Brunia	pillansii	Class.-Bockh. & E.G.H.Oliv.	Shrub
Bruniaceae	Brunia	sacculata	(Dummer) Class.-Bockh. & E.G.H.Oliv.	Shrub
Bruniaceae	Brunia	schlechteri	(Dummer) Class.-Bockh. & E.G.H.Oliv.	Shrub
Bruniaceae	Brunia	sphaerocephala	(Sond.) A.V.Hall	Shrub
Bruniaceae	Brunia	trigyna	(Schltr.) Class.-Bockh. & E.G.H.Oliv.	Shrub
Bruniaceae	Brunia	villosa	(C.Presl) E.Mey. ex Sond.	Shrub
Bruniaceae	Staavia	capitella	(Thunb.) Sond.	Shrub
Bruniaceae	Staavia	dodii	Bolus	Shrub
Bruniaceae	Staavia	glutinosa	(P.J.Bergius) Dahl	Shrub
Bruniaceae	Staavia	staavioides	(Sond.) A.V.Hall	Shrub
Bruniaceae	Staavia	trichotoma	(Thunb.) Pillans	Shrub
Bruniaceae	Staavia	zeyheri	Sond.	Shrub
Burseraceae	Commiphora	edulis	(Klotzsch) Engl.	Tree
Burseraceae	Commiphora	glandulosa	Schinz	Shrub; Tree
Burseraceae	Commiphora	harveyi	(Engl.) Engl.	Shrub; Tree
Burseraceae	Commiphora	mollis	(Oliv.) Engl.	Tree
Burseraceae	Commiphora	pyracanthoides	Engl.	Shrub; Tree
Burseraceae	Commiphora	schimperi	(O.Berg) Engl.	Shrub; Tree
Burseraceae	Commiphora	tenuipetiolata	Engl.	Shrub; Tree
Burseraceae	Commiphora	viminea	Burtt Davy	Tree
Burseraceae	Commiphora	woodii	Engl.	Tree
Burseraceae	Commiphora	zanzibarica	(Baill.) Engl.	Tree
Buxaceae	Buxus	macowanii	Oliv.	Shrub; Tree
Buxaceae	Buxus	natalensis	(Oliv.) Hutch.	Shrub; Tree
Canellaceae	Warburgia	salutaris	(G.Bertol.) Chiov.	Shrub; Tree
Cannabaceae	Celtis	africana	Burm.f.	Shrub; Tree
Cannabaceae	Celtis	gomphophylla	Baker	Tree
Cannabaceae	Celtis	mildbraedii	Engl.	Tree
Cannabaceae	Chaetachme	aristata	Planch.	Shrub; Tree
Cannabaceae	Trema	orientalis	(L.) Blume	Shrub; Tree
Capparaceae	Bachmannia	woodii	(Oliv.) Gilg	Tree; Climber; Shrub
Capparaceae	Boscia	albitrunca	(Burch.) Gilg & Gilg-Ben.	Shrub; Tree
Capparaceae	Boscia	angustifolia	A.Rich.	Tree
Capparaceae	Boscia	foetida	Schinz	Tree; Shrub
Capparaceae	Boscia	mossambicensis	Klotzsch	Tree; Shrub
Capparaceae	Boscia	oleoides	(Burch. ex DC.) Toelken	Tree
Capparaceae	Cadaba	aphylla	(Thunb.) Wild	Tree; Shrub
Capparaceae	Cadaba	natalensis	Sond.	Shrub; Tree
Capparaceae	Cadaba	termitaria	N.E.Br.	Shrub
Capparaceae	Cladostemon	kirkii	(Oliv.) Pax & Gilg	Shrub; Tree
Capparaceae	Maerua	angolensis	DC.	Shrub; Tree
Capparaceae	Maerua	brevipetiolata	Killick	Shrub
Capparaceae	Maerua	cafra	(DC.) Pax	Shrub; Tree
Capparaceae	Maerua	decumbens	(Brongn.) DeWolf	Shrub
Capparaceae	Maerua	gilgii	Schinz	Tree; Shrub
Capparaceae	Maerua	juncea	Pax	Climber; Shrub
Capparaceae	Maerua	nervosa	(Hochst.) Oliv.	Tree; Shrub
Capparaceae	Maerua	parvifolia	Pax	Shrub
Capparaceae	Maerua	racemulosa	(A.DC.) Gilg & Gilg-Ben.	Tree; Climber; Shrub
Capparaceae	Maerua	rosmarinoides	(Sond.) Gilg & Gilg-Ben.	Tree; Shrub
Capparaceae	Maerua	schinzii	Pax	Tree
Capparaceae	Thilachium	africanum	Lour.	Tree; Shrub
Celastraceae	Allocassine	laurifolia	(Harv.) N.Robson	Climber; Shrub
Celastraceae	Cassine	parvifolia	Sond.	Tree; Shrub
Celastraceae	Cassine	peragua	L.	Shrub
Celastraceae	Cassine	schinoides	(Spreng.) R.H.Archer	Shrub; Tree
Celastraceae	Catha	edulis	(Vahl) Forssk. ex Endl.	Shrub; Tree
Celastraceae	Elachyptera	parvifolia	(Oliv.) N.Halle	Climber; Shrub
Celastraceae	Elaeodendron	croceum	(Thunb.) DC.	Tree
Celastraceae	Elaeodendron	transvaalense	(Burtt Davy) R.H.Archer	Shrub; Tree
Celastraceae	Elaeodendron	zeyheri	Spreng. ex Turcz.	Tree
Celastraceae	Gloveria	integrifolia	(L.f.) Jordaan	Shrub
Celastraceae	Gymnosporia	arenicola	Jordaan	Tree; Shrub
Celastraceae	Gymnosporia	bachmannii	Loes.	Shrub; Tree
Celastraceae	Gymnosporia	buxifolia	(L.) Szyszyl.	Shrub; Tree
Celastraceae	Gymnosporia	capitata	(E.Mey. ex Sond.) Loes.	Shrub
Celastraceae	Gymnosporia	devenishii	Jordaan	Shrub; Tree
Celastraceae	Gymnosporia	gariepensis	Jordaan	Shrub
Celastraceae	Gymnosporia	glaucophylla	Jordaan	Shrub; Tree
Celastraceae	Gymnosporia	grandifolia	(Davison) Jordaan	Tree
Celastraceae	Gymnosporia	harveyana	Loes.	Shrub; Tree
Celastraceae	Gymnosporia	linearis	(L.f.) Loes.	Tree; Shrub
Celastraceae	Gymnosporia	maranguensis	(Loes.) Loes.	Shrub; Tree
Celastraceae	Gymnosporia	nemorosa	(Eckl. & Zeyh.) Szyszyl.	Shrub; Tree
Celastraceae	Gymnosporia	polyacantha	Szyszyl.	Shrub; Tree
Celastraceae	Gymnosporia	pubescens	(N.Robson) Jordaan	Shrub; Tree
Celastraceae	Gymnosporia	putterlickioides	Loes.	Tree; Shrub
Celastraceae	Gymnosporia	rubra	(Harv.) Loes.	Shrub; Tree
Celastraceae	Gymnosporia	senegalensis	(Lam.) Loes.	Shrub; Tree
Celastraceae	Gymnosporia	tenuispina	(Sond.) Szyszyl.	Shrub
Celastraceae	Loeseneriella	africana	(Willd.) R.Wilczek	Climber; Shrub
Celastraceae	Loeseneriella	crenata	(Klotzsch) R.Wilczek ex N.Halle	Climber; Shrub
Celastraceae	Lydenburgia	abbottii	(A.E.van Wyk & M.Prins) Steenkamp, A.E.van Wyk & M.Prins	Tree
Celastraceae	Lydenburgia	cassinoides	N.Robson	Shrub; Tree
Celastraceae	Maurocenia	frangula	Mill.	Shrub; Tree
Celastraceae	Maytenus	abbottii	A.E.van Wyk	Tree
Celastraceae	Maytenus	acuminata	(L.f.) Loes.	Shrub; Tree
Celastraceae	Maytenus	albata	(N.E.Br.) E.Schmidt bis & Jordaan	Shrub; Tree
Celastraceae	Maytenus	cordata	(E.Mey. ex Sond.) Loes.	Tree; Shrub
Celastraceae	Maytenus	deflexa	(Sprague) E.Schmidt bis & Jordaan	Shrub; Tree
Celastraceae	Maytenus	ilicina	(Burch.) Loes.	Shrub; Tree
Celastraceae	Maytenus	lucida	(L.) Loes.	Shrub
Celastraceae	Maytenus	monococca	(Davison) Loes.	Shrub; Tree
Celastraceae	Maytenus	oleoides	(Lam.) Loes.	Shrub; Tree
Celastraceae	Maytenus	oleosa	A.E.van Wyk & R.H.Archer	Tree
Celastraceae	Maytenus	peduncularis	(Sond.) Loes.	Shrub; Tree
Celastraceae	Maytenus	undata	(Thunb.) Blakelock	Shrub; Tree
Celastraceae	Mystroxylon	aethiopicum	(Thunb.) Loes.	Shrub; Tree
Celastraceae	Pleurostylia	capensis	(Turcz.) Loes.	Shrub; Tree
Celastraceae	Pristimera	bojeri	(Tul.) N.Halle	Climber; Shrub
Celastraceae	Pristimera	delagoensis	(Loes.) R.H.Archer	Climber; Shrub
Celastraceae	Pristimera	longipetiolata	(Oliv.) N.Halle	Climber; Shrub
Celastraceae	Pristimera	peglerae	(Loes.) R.H.Archer	Climber; Shrub
Celastraceae	Pseudosalacia	streyi	Codd	Shrub; Tree
Celastraceae	Pterocelastrus	echinatus	N.E.Br.	Shrub; Tree
Celastraceae	Pterocelastrus	galpinii	Loes.	Shrub; Tree
Celastraceae	Pterocelastrus	rostratus	(Thunb.) Walp.	Tree
Celastraceae	Pterocelastrus	tricuspidatus	(Lam.) Walp.	Shrub; Tree
Celastraceae	Putterlickia	pyracantha	(L.) Szyszyl.	Shrub
Celastraceae	Putterlickia	saxatilis	(Burch.) Jordaan	Shrub
Celastraceae	Putterlickia	verrucosa	(E.Mey. ex Sond.) Szyszyl.	Tree; Shrub
Celastraceae	Reissantia	indica	(Willd.) N.Halle	Climber; Shrub
Celastraceae	Robsonodendron	eucleiforme	(Eckl. & Zeyh.) R.H.Archer	Tree
Celastraceae	Robsonodendron	maritimum	(Bolus) R.H.Archer	Shrub
Celastraceae	Salacia	leptoclada	Tul.	Shrub
Chrysobalanaceae	Parinari	curatellifolia	Planch. ex Benth.	Tree
Clusiaceae	Garcinia	gerrardii	Harv. ex Sim	Shrub; Tree
Clusiaceae	Garcinia	livingstonei	T.Anderson	Tree
Combretaceae	Combretum	apiculatum	Sond.	Shrub; Tree
Combretaceae	Combretum	bracteosum	(Hochst.) Engl. & Diels	Tree; Climber; Shrub
Combretaceae	Combretum	caffrum	(Eckl. & Zeyh.) Kuntze	Tree
Combretaceae	Combretum	collinum	Fresen.	Tree
Combretaceae	Combretum	edwardsii	Exell	Tree; Shrub
Combretaceae	Combretum	erythrophyllum	(Burch.) Sond.	Shrub; Tree
Combretaceae	Combretum	eugeneanum	R.G.C.Boon, Jordaan & A.E.van Wyk	Shrub; Climber
Combretaceae	Combretum	imberbe	Wawra	Shrub; Tree
Combretaceae	Combretum	kraussii	Hochst.	Shrub; Tree
Combretaceae	Combretum	microphyllum	Klotzsch	Climber; Shrub
Combretaceae	Combretum	mkuzense	J.D.Carr & Retief	Shrub; Tree
Combretaceae	Combretum	moggii	Exell	Tree; Shrub
Combretaceae	Combretum	molle	R.Br. ex G.Don	Tree
Combretaceae	Combretum	mossambicense	(Klotzsch) Engl.	Tree; Climber; Shrub
Combretaceae	Combretum	nelsonii	Dummer	Tree; Shrub
Combretaceae	Combretum	padoides	Engl. & Diels	Tree; Shrub
Combretaceae	Combretum	petrophilum	Retief	Tree; Shrub
Combretaceae	Combretum	woodii	Dummer	Climber; Shrub; Tree
Combretaceae	Combretum	zeyheri	Sond.	Shrub; Tree
Combretaceae	Lumnitzera	racemosa	Willd.	Shrub; Tree
Combretaceae	Pteleopsis	myrtifolia	(M.A.Lawson) Engl. & Diels	Tree
Combretaceae	Terminalia	brachystemma	Welw. ex Hiern	Tree
Combretaceae	Terminalia	phanerophlebia	Engl. & Diels	Shrub; Tree
Combretaceae	Terminalia	prunioides	M.A.Lawson	Shrub; Tree
Combretaceae	Terminalia	sericea	Burch. ex DC.	Tree
Connaraceae	Cnestis	polyphylla	Lam.	Climber; Shrub; Tree
Convolvulaceae	Ipomoea	holubii	Baker	Shrub
Convolvulaceae	Merremia	pterygocaulos	(Choisy) Hallier f.	Climber; Shrub
Convolvulaceae	Paralepistemon	shirensis	(Oliv.) Lejoly & Lisowski	Climber; Shrub
Cunoniaceae	Cunonia	capensis	L.	Tree
Cunoniaceae	Platylophus	trifoliatus	(L.f.) D.Don	Tree
Cupressaceae	Widdringtonia	nodiflora	(L.) Powrie	Shrub; Tree
Cupressaceae	Widdringtonia	schwarzii	(Marloth) Mast.	Tree
Curtisiaceae	Curtisia	dentata	(Burm.f.) C.A.Sm.	Shrub; Tree
Cyatheaceae	Alsophila	capensis	(L.f.) J.Sm.	Tree
Cyatheaceae	Alsophila	dregei	(Kunze) R.M.Tryon	Tree
Dichapetalaceae	Tapura	fischeri	Engl.	Shrub; Tree
Ebenaceae	Diospyros	acocksii	(De Winter) De Winter	Shrub
Ebenaceae	Diospyros	austroafricana	De Winter	Shrub
Ebenaceae	Diospyros	dichrophylla	(Gand.) De Winter	Shrub; Tree
Ebenaceae	Diospyros	glabra	(L.) De Winter	Shrub
Ebenaceae	Diospyros	glandulifera	De Winter	Shrub
Ebenaceae	Diospyros	inhacaensis	F.White	Shrub; Tree
Ebenaceae	Diospyros	loureiroana	G.Don	Shrub; Tree
Ebenaceae	Diospyros	lycioides	Desf.	Shrub; Tree
Ebenaceae	Diospyros	mespiliformis	Hochst. ex A.DC.	Tree
Ebenaceae	Diospyros	natalensis	(Harv.) Brenan	Shrub; Tree
Ebenaceae	Diospyros	pallens	(Thunb.) F.White	Shrub
Ebenaceae	Diospyros	ramulosa	(E.Mey. ex A.DC.) De Winter	Shrub
Ebenaceae	Diospyros	rotundifolia	Hiern	Tree
Ebenaceae	Diospyros	scabrida	(Harv. ex Hiern) De Winter	Shrub
Ebenaceae	Diospyros	simii	(Kuntze) De Winter	Climber; Shrub
Ebenaceae	Diospyros	villosa	(L.) De Winter	Shrub
Ebenaceae	Diospyros	whyteana	(Hiern) F.White	Shrub; Tree
Ebenaceae	Euclea	coriacea	A.DC.	Shrub; Tree
Ebenaceae	Euclea	crispa	(Thunb.) Gurke	Shrub; Tree
Ebenaceae	Euclea	daphnoides	Hiern	Shrub; Tree
Ebenaceae	Euclea	dewinteri	Retief	Shrub
Ebenaceae	Euclea	divinorum	Hiern	Shrub; Tree
Ebenaceae	Euclea	lancea	Thunb.	Shrub
Ebenaceae	Euclea	linearis	Zeyh. ex Hiern	Shrub; Tree
Ebenaceae	Euclea	natalensis	A.DC.	Tree; Shrub
Ebenaceae	Euclea	pseudebenus	E.Mey. ex A.DC.	Shrub; Tree
Ebenaceae	Euclea	racemosa	L.	Shrub; Tree
Ebenaceae	Euclea	schimperi	(A.DC.) Dandy	Shrub; Tree
Ebenaceae	Euclea	tomentosa	E.Mey. ex A.DC.	Shrub
Ebenaceae	Euclea	undulata	Thunb.	Shrub; Tree
Ericaceae	Erica	abietina	L.	Shrub
Ericaceae	Erica	acuta	Andrews	Shrub
Ericaceae	Erica	affinis	Benth.	Shrub
Ericaceae	Erica	albens	L.	Shrub
Ericaceae	Erica	albescens	Klotzsch ex Benth.	Shrub
Ericaceae	Erica	algida	Bolus	Shrub
Ericaceae	Erica	alnea	E.G.H.Oliv.	Shrub
Ericaceae	Erica	alopecurus	Harv.	Shrub
Ericaceae	Erica	altiphila	E.G.H.Oliv.	Shrub
Ericaceae	Erica	amatolensis	E.G.H.Oliv.	Shrub
Ericaceae	Erica	aneimena	Dulfer	Shrub
Ericaceae	Erica	angulosa	E.G.H.Oliv.	Shrub
Ericaceae	Erica	annalis	E.G.H.Oliv. & I.M.Oliv.	Shrub
Ericaceae	Erica	arcuata	Compton	Shrub
Ericaceae	Erica	arenaria	L.Bolus	Shrub
Ericaceae	Erica	artemisioides	(Klotzsch) E.G.H.Oliv.	Shrub
Ericaceae	Erica	astroites	Guthrie & Bolus	Shrub
Ericaceae	Erica	atrovinosa	E.G.H.Oliv.	Shrub
Ericaceae	Erica	axillaris	Thunb.	Shrub
Ericaceae	Erica	axilliflora	Bartl.	Shrub
Ericaceae	Erica	baccans	L.	Shrub
Ericaceae	Erica	banksii	Andrews	Shrub
Ericaceae	Erica	barrydalensis	L.Bolus	Shrub
Ericaceae	Erica	bauera	Andrews	Shrub
Ericaceae	Erica	baurii	Bolus	Shrub
Ericaceae	Erica	benthamiana	E.G.H.Oliv.	Shrub
Ericaceae	Erica	bergiana	L.	Shrub
Ericaceae	Erica	berzelioides	Guthrie & Bolus	Shrub
Ericaceae	Erica	bibax	Salisb.	Shrub
Ericaceae	Erica	binaria	E.G.H.Oliv.	Shrub
Ericaceae	Erica	blandfordia	Andrews	Shrub
Ericaceae	Erica	blenna	Salisb.	Shrub
Ericaceae	Erica	bodkinii	Guthrie & Bolus	Shrub
Ericaceae	Erica	boucheri	E.G.H.Oliv.	Shrub
Ericaceae	Erica	brachialis	Salisb.	Shrub
Ericaceae	Erica	bredasiana	E.G.H.Oliv.	Shrub
Ericaceae	Erica	brownleeae	Bolus	Shrub
Ericaceae	Erica	bruniifolia	Salisb.	Shrub
Ericaceae	Erica	burchelliana	E.G.H.Oliv.	Shrub
Ericaceae	Erica	caffra	L.	Shrub; Tree
Ericaceae	Erica	caffrorum	Bolus	Shrub
Ericaceae	Erica	calcicola	(E.G.H.Oliv.) E.G.H.Oliv.	Shrub
Ericaceae	Erica	caledonica	A.Spreng.	Shrub
Ericaceae	Erica	calycina	L.	Shrub
Ericaceae	Erica	campanularis	Salisb.	Shrub
Ericaceae	Erica	canaliculata	Andrews	Shrub
Ericaceae	Erica	caterviflora	Salisb.	Shrub
Ericaceae	Erica	cavartica	E.G.H.Oliv. & I.M.Oliv.	Shrub
Ericaceae	Erica	ceraria	E.G.H.Oliv. & I.M.Oliv.	Shrub
Ericaceae	Erica	cerinthoides	L.	Shrub
Ericaceae	Erica	cetrata	E.G.H.Oliv.	Shrub
Ericaceae	Erica	chamissonis	Klotzsch ex Benth.	Shrub
Ericaceae	Erica	chionodes	E.G.H.Oliv.	Shrub
Ericaceae	Erica	chiroptera	E.G.H.Oliv.	Shrub
Ericaceae	Erica	chlorosepala	Benth.	Shrub
Ericaceae	Erica	coarctata	J.C.Wendl.	Shrub
Ericaceae	Erica	coccinea	L.	Shrub
Ericaceae	Erica	colorans	Andrews	Shrub
Ericaceae	Erica	columnaris	E.G.H.Oliv.	Shrub
Ericaceae	Erica	constantia	Nois. ex Benth.	Shrub
Ericaceae	Erica	cruenta	Aiton	Shrub
Ericaceae	Erica	curvifolia	Salisb.	Shrub
Ericaceae	Erica	curvirostris	Salisb.	Shrub
Ericaceae	Erica	cyathiformis	Salisb.	Shrub
Ericaceae	Erica	cylindrica	Thunb.	Shrub
Ericaceae	Erica	cyrilliflora	Salisb.	Shrub
Ericaceae	Erica	daphniflora	Salisb.	Shrub
Ericaceae	Erica	demissa	Klotzsch ex Benth.	Shrub
Ericaceae	Erica	discolor	Andrews	Shrub
Ericaceae	Erica	dolfiana	E.G.H.Oliv. & I.M.Oliv.	Shrub
Ericaceae	Erica	doliiformis	Salisb.	Shrub
Ericaceae	Erica	dominans	Killick	Shrub
Ericaceae	Erica	dracomontana	E.G.H.Oliv.	Shrub
Ericaceae	Erica	drakensbergensis	Guthrie & Bolus	Shrub
Ericaceae	Erica	duthieae	L.Bolus	Shrub
Ericaceae	Erica	dysantha	Benth.	Shrub
Ericaceae	Erica	ebracteata	Bolus	Shrub
Ericaceae	Erica	ecklonii	E.G.H.Oliv.	Shrub
Ericaceae	Erica	eglandulosa	(Klotzsch) E.G.H.Oliv.	Shrub
Ericaceae	Erica	elsieana	(E.G.H.Oliv.) E.G.H.Oliv.	Shrub
Ericaceae	Erica	ericoides	(L.) E.G.H.Oliv.	Shrub
Ericaceae	Erica	eriocephala	Lam.	Shrub
Ericaceae	Erica	esteriana	E.G.H.Oliv.	Shrub
Ericaceae	Erica	eugenea	Dulfer	Shrub
Ericaceae	Erica	eustacei	L.Bolus	Shrub
Ericaceae	Erica	evansii	(N.E.Br.) E.G.H.Oliv.	Shrub
Ericaceae	Erica	fairii	Bolus	Shrub
Ericaceae	Erica	fascicularis	L.f.	Shrub
Ericaceae	Erica	fastigiata	L.	Shrub
Ericaceae	Erica	ferrea	P.J.Bergius	Shrub
Ericaceae	Erica	filamentosa	Andrews	Shrub
Ericaceae	Erica	filipendula	Benth.	Shrub
Ericaceae	Erica	fimbriata	Andrews	Shrub
Ericaceae	Erica	flanaganii	Bolus	Shrub
Ericaceae	Erica	floccifera	Zahlbr.	Shrub
Ericaceae	Erica	flocciflora	Benth.	Shrub
Ericaceae	Erica	fontana	L.Bolus	Shrub
Ericaceae	Erica	formosa	Thunb.	Shrub
Ericaceae	Erica	frigida	Bolus	Shrub
Ericaceae	Erica	fuscescens	(Klotzsch) E.G.H.Oliv.	Shrub
Ericaceae	Erica	galpinii	T.M.Salter	Shrub
Ericaceae	Erica	gerhardii	E.G.H.Oliv. & I.M.Oliv.	Shrub
Ericaceae	Erica	gigantea	Klotzsch ex Benth.	Shrub
Ericaceae	Erica	gillii	Benth.	Shrub
Ericaceae	Erica	glabella	Thunb.	Shrub
Ericaceae	Erica	glandulosa	Thunb.	Shrub
Ericaceae	Erica	glaphyra	Killick	Shrub
Ericaceae	Erica	glauca	Andrews	Shrub
Ericaceae	Erica	globulifera	Dulfer	Shrub
Ericaceae	Erica	glomiflora	Salisb.	Shrub
Ericaceae	Erica	glumiflora	Klotzsch ex Benth.	Shrub
Ericaceae	Erica	goatcheriana	L.Bolus	Shrub
Ericaceae	Erica	gracilis	J.C.Wendl.	Shrub
Ericaceae	Erica	granulosa	H.A.Baker	Shrub
Ericaceae	Erica	grata	Guthrie & Bolus	Shrub
Ericaceae	Erica	guthriei	Bolus	Shrub
Ericaceae	Erica	gysbertii	L.Guthrie & Bolus	Shrub
Ericaceae	Erica	haemastoma	J.C.Wendl.	Shrub
Ericaceae	Erica	halicacaba	L.	Shrub
Ericaceae	Erica	hameriana	L.Bolus	Shrub
Ericaceae	Erica	heterophylla	Guthrie & Bolus	Shrub
Ericaceae	Erica	hexensis	E.G.H.Oliv.	Shrub
Ericaceae	Erica	hillburttii	(E.G.H.Oliv.) E.G.H.Oliv.	Shrub
Ericaceae	Erica	hippurus	Compton	Shrub
Ericaceae	Erica	hirta	Thunb.	Shrub
Ericaceae	Erica	hispidula	L.	Shrub
Ericaceae	Erica	hispiduloides	E.G.H.Oliv.	Shrub
Ericaceae	Erica	hottentotica	E.G.H.Oliv.	Shrub
Ericaceae	Erica	humidicola	E.G.H.Oliv.	Shrub
Ericaceae	Erica	ignita	E.G.H.Oliv.	Shrub
Ericaceae	Erica	inamoena	Dulfer	Shrub
Ericaceae	Erica	incarnata	Thunb.	Shrub
Ericaceae	Erica	inclusa	H.L.Wendl. ex Benth.	Shrub
Ericaceae	Erica	inconstans	Zahlbr.	Shrub
Ericaceae	Erica	inflata	Thunb.	Shrub
Ericaceae	Erica	inflaticalyx	E.G.H.Oliv.	Shrub
Ericaceae	Erica	infundibuliformis	Andrews	Shrub
Ericaceae	Erica	inordinata	H.A.Baker	Shrub
Ericaceae	Erica	insolitanthera	H.A.Baker	Shrub
Ericaceae	Erica	intermedia	Klotzsch ex Benth.	Shrub
Ericaceae	Erica	irregularis	Benth.	Shrub
Ericaceae	Erica	jacksoniana	H.A.Baker	Shrub
Ericaceae	Erica	juniperina	E.G.H.Oliv.	Shrub
Ericaceae	Erica	kammanassieae	E.G.H.Oliv.	Shrub
Ericaceae	Erica	karooica	E.G.H.Oliv.	Shrub
Ericaceae	Erica	keetii	L.Bolus	Shrub
Ericaceae	Erica	kogelbergensis	E.G.H.Oliv.	Shrub
Ericaceae	Erica	kougabergensis	H.A.Baker	Shrub
Ericaceae	Erica	kraussiana	Klotzsch	Shrub
Ericaceae	Erica	laeta	Bartl.	Shrub
Ericaceae	Erica	lanata	Andrews	Shrub
Ericaceae	Erica	lanuginosa	Andrews	Shrub
Ericaceae	Erica	latituba	L.Bolus	Shrub
Ericaceae	Erica	lavandulifolia	Salisb.	Shrub
Ericaceae	Erica	lehmannii	Klotzsch ex Benth.	Shrub
Ericaceae	Erica	lerouxiae	Bolus	Shrub
Ericaceae	Erica	leucanthera	L.f.	Shrub
Ericaceae	Erica	leucodesmia	Benth.	Shrub
Ericaceae	Erica	leucopelta	Tausch	Shrub
Ericaceae	Erica	leucotrachela	H.A.Baker	Shrub
Ericaceae	Erica	lithophila	E.G.H.Oliv. & I.M.Oliv.	Shrub
Ericaceae	Erica	loganii	Compton	Shrub
Ericaceae	Erica	longiaristata	Benth.	Shrub
Ericaceae	Erica	longimontana	E.G.H.Oliv.	Shrub
Ericaceae	Erica	longistyla	L.Bolus	Shrub
Ericaceae	Erica	lowryensis	Bolus	Shrub
Ericaceae	Erica	lucida	Salisb.	Shrub
Ericaceae	Erica	macilenta	Guthrie & Bolus	Shrub
Ericaceae	Erica	macowanii	Cufino	Shrub
Ericaceae	Erica	macrophylla	Klotzsch ex Benth.	Shrub
Ericaceae	Erica	macrotrema	L.Guthrie & Bolus	Shrub
Ericaceae	Erica	madida	E.G.H.Oliv.	Shrub
Ericaceae	Erica	maesta	Bolus	Shrub
Ericaceae	Erica	magistrati	E.G.H.Oliv.	Shrub
Ericaceae	Erica	magnisylvae	E.G.H.Oliv.	Shrub
Ericaceae	Erica	mammosa	L.	Shrub
Ericaceae	Erica	massonii	L.f.	Shrub
Ericaceae	Erica	mauritanica	L.	Shrub
Ericaceae	Erica	melanthera	L.	Shrub
Ericaceae	Erica	melastoma	Andrews	Shrub
Ericaceae	Erica	micrandra	Guthrie & Bolus	Shrub
Ericaceae	Erica	miniscula	E.G.H.Oliv.	Shrub
Ericaceae	Erica	mitchellensis	Dulfer	Shrub
Ericaceae	Erica	monadelphia	Andrews	Shrub
Ericaceae	Erica	monsoniana	L.f.	Shrub
Ericaceae	Erica	muscosa	(Aiton) E.G.H.Oliv.	Shrub
Ericaceae	Erica	nabea	Guthrie & Bolus	Shrub
Ericaceae	Erica	natalitia	Bolus	Shrub
Ericaceae	Erica	nematophylla	Guthrie & Bolus	Shrub
Ericaceae	Erica	nemorosa	Klotzsch ex Benth.	Shrub
Ericaceae	Erica	nevillei	L.Bolus	Shrub
Ericaceae	Erica	nutans	J.C.Wendl.	Shrub
Ericaceae	Erica	oakesiorum	E.G.H.Oliv.	Shrub
Ericaceae	Erica	oatesii	Rolfe	Shrub
Ericaceae	Erica	obconica	H.A.Baker	Shrub
Ericaceae	Erica	oblongiflora	Benth.	Shrub
Ericaceae	Erica	odorata	Andrews	Shrub
Ericaceae	Erica	opulenta	(J.C.Wendl. ex Klotzsch) Benth.	Shrub
Ericaceae	Erica	oresigena	Bolus	Shrub
Ericaceae	Erica	ostiaria	Compton	Shrub
Ericaceae	Erica	ovina	Klotzsch ex Benth.	Shrub
Ericaceae	Erica	oxysepala	Guthrie & Bolus	Shrub
Ericaceae	Erica	pageana	L.Bolus	Shrub
Ericaceae	Erica	papyracea	Guthrie & Bolus	Shrub
Ericaceae	Erica	parilis	Salisb.	Shrub
Ericaceae	Erica	parviflora	L.	Shrub
Ericaceae	Erica	parviporandra	E.G.H.Oliv.	Shrub
Ericaceae	Erica	passerinoides	(Bolus) E.G.H.Oliv.	Shrub
Ericaceae	Erica	patersonia	Andrews	Shrub
Ericaceae	Erica	pectinifolia	Salisb.	Shrub
Ericaceae	Erica	peltata	Andrews	Shrub
Ericaceae	Erica	penduliflora	E.G.H.Oliv.	Shrub
Ericaceae	Erica	penicilliformis	Salisb.	Shrub
Ericaceae	Erica	perplexa	E.G.H.Oliv.	Shrub
Ericaceae	Erica	perspicua	J.C.Wendl.	Shrub
Ericaceae	Erica	petrusiana	E.G.H.Oliv. & I.M.Oliv.	Shrub
Ericaceae	Erica	peziza	Lodd.	Shrub
Ericaceae	Erica	phacelanthera	E.G.H.Oliv.	Shrub
Ericaceae	Erica	phaeocarpa	(N.E.Br.) E.G.H.Oliv.	Shrub
Ericaceae	Erica	philippioides	Compton	Shrub
Ericaceae	Erica	physodes	L.	Shrub
Ericaceae	Erica	pilaarkopensis	H.A.Baker	Shrub
Ericaceae	Erica	pillansii	Bolus	Shrub
Ericaceae	Erica	plena	L.Bolus	Shrub
Ericaceae	Erica	plukenetii	L.	Shrub
Ericaceae	Erica	plumigera	Bartl.	Shrub
Ericaceae	Erica	plumosa	Thunb.	Shrub
Ericaceae	Erica	polifolia	Salisb. ex Benth.	Shrub
Ericaceae	Erica	polycoma	Benth.	Shrub
Ericaceae	Erica	portenschlagiana	Dulfer	Shrub
Ericaceae	Erica	praecox	Klotzsch	Shrub
Ericaceae	Erica	priorii	Guthrie & Bolus	Shrub
Ericaceae	Erica	procaviana	(E.G.H.Oliv.) E.G.H.Oliv.	Shrub
Ericaceae	Erica	propendens	Andrews	Shrub
Ericaceae	Erica	psittacina	E.G.H.Oliv. & I.M.Oliv.	Shrub
Ericaceae	Erica	pubescens	L.	Shrub
Ericaceae	Erica	pulchella	Houtt.	Shrub
Ericaceae	Erica	pyramidalis	Sol.	Shrub
Ericaceae	Erica	quadrifida	(Benth.) E.G.H.Oliv.	Shrub
Ericaceae	Erica	recta	Bolus	Shrub
Ericaceae	Erica	regia	Bartl.	Shrub
Ericaceae	Erica	rehmii	Dulfer	Shrub
Ericaceae	Erica	revoluta	(Bolus) L.E.Davidson	Shrub
Ericaceae	Erica	rhodantha	Guthrie & Bolus	Shrub
Ericaceae	Erica	rivularis	L.E.Davidson	Shrub
Ericaceae	Erica	rosacea	(L.Guthrie) E.G.H.Oliv.	Shrub
Ericaceae	Erica	rudolfii	Bolus	Shrub
Ericaceae	Erica	rugata	E.G.H.Oliv.	Shrub
Ericaceae	Erica	russakiana	E.G.H.Oliv.	Shrub
Ericaceae	Erica	sacciflora	Salisb.	Shrub
Ericaceae	Erica	sagittata	Klotzsch ex Benth.	Shrub
Ericaceae	Erica	salicina	E.G.H.Oliv.	Shrub
Ericaceae	Erica	savilea	Andrews	Shrub
Ericaceae	Erica	saxigena	Dulfer	Shrub
Ericaceae	Erica	scabriuscula	G.Lodd.	Shrub
Ericaceae	Erica	schelpeorum	E.G.H.Oliv. & I.M.Oliv.	Shrub
Ericaceae	Erica	schlechteri	Bolus	Shrub
Ericaceae	Erica	scytophylla	Guthrie & Bolus	Shrub
Ericaceae	Erica	selaginifolia	Salisb.	Shrub
Ericaceae	Erica	seriphiifolia	Salisb.	Shrub
Ericaceae	Erica	serrata	Thunb.	Shrub
Ericaceae	Erica	sessiliflora	L.f.	Shrub
Ericaceae	Erica	simii	(S.Moore) E.G.H.Oliv.	Shrub
Ericaceae	Erica	simulans	Dulfer	Shrub
Ericaceae	Erica	sitiens	Klotzsch	Shrub
Ericaceae	Erica	sparrmannii	L.f.	Shrub
Ericaceae	Erica	sparsa	Lodd.	Shrub
Ericaceae	Erica	spectabilis	Klotzsch ex Benth.	Shrub
Ericaceae	Erica	sperata	E.G.H.Oliv.	Shrub
Ericaceae	Erica	stagnalis	Salisb.	Shrub
Ericaceae	Erica	steinbergiana	H.L.Wendl. ex Klotzsch	Shrub
Ericaceae	Erica	stokoeanthus	E.G.H.Oliv.	Shrub
Ericaceae	Erica	straussiana	Gilg	Shrub
Ericaceae	Erica	strigilifolia	Salisb.	Shrub
Ericaceae	Erica	subcapitata	(N.E.Br.) E.G.H.Oliv.	Shrub
Ericaceae	Erica	subdivaricata	P.J.Bergius	Shrub
Ericaceae	Erica	subulata	J.C.Wendl.	Shrub
Ericaceae	Erica	syngenesia	Compton	Shrub
Ericaceae	Erica	taxifolia	Dryand.	Shrub
Ericaceae	Erica	tegulifolia	Salisb.	Shrub
Ericaceae	Erica	terniflora	E.G.H.Oliv.	Shrub
Ericaceae	Erica	tetragona	L.f.	Shrub
Ericaceae	Erica	thamnoides	E.G.H.Oliv.	Shrub
Ericaceae	Erica	thodei	Guthrie & Bolus	Shrub
Ericaceae	Erica	thomae	L.Bolus	Shrub
Ericaceae	Erica	thunbergii	Montin	Shrub
Ericaceae	Erica	tomentosa	Salisb.	Shrub
Ericaceae	Erica	toringbergensis	H.A.Baker	Shrub
Ericaceae	Erica	trachysantha	Bolus	Shrub
Ericaceae	Erica	triceps	Link	Shrub
Ericaceae	Erica	trichadenia	Bolus	Shrub
Ericaceae	Erica	trichophora	Benth.	Shrub
Ericaceae	Erica	triflora	L.	Shrub
Ericaceae	Erica	tristis	Bartl.	Shrub
Ericaceae	Erica	tumida	Ker Gawl.	Shrub
Ericaceae	Erica	uberiflora	E.G.H.Oliv.	Shrub
Ericaceae	Erica	umbratica	E.G.H.Oliv. & I.M.Oliv.	Shrub
Ericaceae	Erica	unilateralis	Klotzsch ex Benth.	Shrub
Ericaceae	Erica	urceolata	(Klotzsch) E.G.H.Oliv.	Shrub
Ericaceae	Erica	urna-viridis	Bolus	Shrub
Ericaceae	Erica	uysii	H.A.Baker	Shrub
Ericaceae	Erica	vallis-aranearum	E.G.H.Oliv.	Shrub
Ericaceae	Erica	vallis-fluminis	E.G.H.Oliv.	Shrub
Ericaceae	Erica	varderi	L.Bolus	Shrub
Ericaceae	Erica	velatiflora	E.G.H.Oliv.	Shrub
Ericaceae	Erica	velitaris	Salisb.	Shrub
Ericaceae	Erica	ventricosa	Thunb.	Shrub
Ericaceae	Erica	verecunda	Salisb.	Shrub
Ericaceae	Erica	versicolor	Andrews	Shrub
Ericaceae	Erica	vestita	Thunb.	Shrub
Ericaceae	Erica	viridiflora	Andrews	Shrub
Ericaceae	Erica	viridimontana	E.G.H.Oliv. & I.M.Oliv.	Shrub
Ericaceae	Erica	viscaria	L.	Shrub
Ericaceae	Erica	viscidiflora	Esterh.	Shrub
Ericaceae	Erica	viscosissima	E.G.H.Oliv.	Shrub
Ericaceae	Erica	vlokii	E.G.H.Oliv.	Shrub
Ericaceae	Erica	vogelpoelii	H.A.Baker	Shrub
Ericaceae	Erica	walkeria	Andrews	Shrub
Ericaceae	Erica	wendlandiana	Klotzsch	Shrub
Ericaceae	Erica	williamsiorum	E.G.H.Oliv.	Shrub
Ericaceae	Erica	xanthina	Guthrie & Bolus	Shrub
Ericaceae	Erica	zebrensis	Compton	Shrub
Ericaceae	Erica	zeyheriana	(Klotzsch) E.G.H.Oliv.	Shrub
Ericaceae	Erica	zitzikammensis	Dulfer	Shrub
Ericaceae	Erica	zwartbergensis	Bolus	Shrub
Ericaceae	Vaccinium	exul	Bolus	Shrub; Tree
Erythroxylaceae	Erythroxylum	delagoense	Schinz	Tree; Shrub
Erythroxylaceae	Erythroxylum	emarginatum	Thonn.	Tree; Shrub
Erythroxylaceae	Erythroxylum	pictum	E.Mey. ex Harv. & Sond.	Shrub; Tree
Erythroxylaceae	Nectaropetalum	capense	(Bolus) Stapf & Boodle	Tree
Erythroxylaceae	Nectaropetalum	zuluense	(Schonland) Corbishley	Tree
Euphorbiaceae	Acalypha	capensis	(L.f.) Prain	Shrub
Euphorbiaceae	Acalypha	glabrata	Thunb.	Shrub; Tree
Euphorbiaceae	Acalypha	pubiflora	Baill.	Shrub; Tree
Euphorbiaceae	Acalypha	sonderiana	Mull.Arg.	Shrub; Tree
Euphorbiaceae	Alchornea	hirtella	Benth.	Shrub; Tree
Euphorbiaceae	Alchornea	laxiflora	(Benth.) Pax & K.Hoffm.	Shrub; Tree
Euphorbiaceae	Cavacoa	aurea	(Cavaco) J.Leonard	Tree
Euphorbiaceae	Croton	gratissimus	Burch.	Shrub; Tree
Euphorbiaceae	Croton	madandensis	S.Moore	Tree; Shrub
Euphorbiaceae	Croton	megalobotrys	Mull.Arg.	Tree
Euphorbiaceae	Croton	menyharthii	Pax	Tree; Shrub
Euphorbiaceae	Croton	pseudopulchellus	Pax	Tree; Shrub
Euphorbiaceae	Croton	rivularis	Mull.Arg.	Shrub
Euphorbiaceae	Croton	steenkampianus	Gerstner	Tree; Shrub
Euphorbiaceae	Croton	sylvaticus	Hochst.	Shrub; Tree
Euphorbiaceae	Erythrococca	berberidea	Prain	Shrub
Euphorbiaceae	Erythrococca	menyharthii	(Pax) Prain	Shrub
Euphorbiaceae	Erythrococca	natalensis	Prain	Shrub
Euphorbiaceae	Erythrococca	trichogyne	(Mull.Arg.) Prain	Shrub; Tree
Euphorbiaceae	Excoecaria	simii	(Kuntze) Pax	Shrub; Tree
Euphorbiaceae	Macaranga	capensis	(Baill.) Benth. ex Sim	Tree
Euphorbiaceae	Micrococca	capensis	(Baill.) Prain	Shrub; Tree
Euphorbiaceae	Schinziophyton	rautanenii	(Schinz) Radcl.-Sm.	Tree
Euphorbiaceae	Sclerocroton	integerrimus	Hochst.	Shrub; Tree
Euphorbiaceae	Shirakiopsis	elliptica	(Hochst.) Esser	Tree
Euphorbiaceae	Spirostachys	africana	Sond.	Shrub; Tree
Euphorbiaceae	Suregada	africana	(Sond.) Kuntze	Shrub; Tree
Euphorbiaceae	Suregada	procera	(Prain) Croizat	Tree
Euphorbiaceae	Suregada	zanzibariensis	Baill.	Tree
Fabaceae	Adenolobus	garipensis	(E.Mey.) Torre & Hillc.	Shrub; Tree
Fabaceae	Adenopodia	spicata	(E.Mey.) C.Presl	Climber; Shrub
Fabaceae	Aeschynomene	nodulosa	(Baker) Baker f.	Shrub
Fabaceae	Aeschynomene	rehmannii	Schinz	Shrub
Fabaceae	Afzelia	quanzensis	Welw.	Tree
Fabaceae	Albizia	adianthifolia	(Schumach.) W.Wight	Tree
Fabaceae	Albizia	amara	(Roxb.) Boivin	Tree
Fabaceae	Albizia	anthelmintica	(A.Rich.) Brongn.	Shrub; Tree
Fabaceae	Albizia	antunesiana	Harms	Shrub; Tree
Fabaceae	Albizia	brevifolia	Schinz	Shrub; Tree
Fabaceae	Albizia	forbesii	Benth.	Tree
Fabaceae	Albizia	harveyi	E.Fourn.	Tree
Fabaceae	Albizia	petersiana	(Bolle) Oliv.	Tree
Fabaceae	Albizia	suluensis	Gerstner	Tree
Fabaceae	Albizia	tanganyicensis	Baker f.	Tree
Fabaceae	Albizia	versicolor	Welw. ex Oliv.	Tree
Fabaceae	Amphithalea	axillaris	Granby	Shrub
Fabaceae	Amphithalea	cuneifolia	Eckl. & Zeyh.	Shrub
Fabaceae	Amphithalea	ericifolia	(L.) Eckl. & Zeyh.	Shrub
Fabaceae	Amphithalea	flava	(Granby) A.L.Schutte	Shrub
Fabaceae	Amphithalea	fourcadei	Compton	Shrub
Fabaceae	Amphithalea	imbricata	(L.) Druce	Shrub
Fabaceae	Amphithalea	micrantha	Walp.	Shrub
Fabaceae	Amphithalea	pageae	(L.Bolus) A.L.Schutte	Shrub
Fabaceae	Amphithalea	parvifolia	(Thunb.) A.L.Schutte	Shrub
Fabaceae	Amphithalea	perplexa	Eckl. & Zeyh.	Shrub
Fabaceae	Amphithalea	phylicoides	Eckl. & Zeyh.	Shrub
Fabaceae	Amphithalea	sericea	Schltr.	Shrub
Fabaceae	Amphithalea	speciosa	Schltr.	Shrub
Fabaceae	Amphithalea	spinosa	(Harv.) A.L.Schutte	Shrub
Fabaceae	Amphithalea	stokoei	L.Bolus	Shrub
Fabaceae	Amphithalea	tomentosa	(Thunb.) Granby	Shrub
Fabaceae	Amphithalea	violacea	(E.Mey.) Benth.	Shrub
Fabaceae	Argyrolobium	frutescens	Burtt Davy	Shrub
Fabaceae	Argyrolobium	parviflorum	T.J.Edwards	Shrub
Fabaceae	Argyrolobium	wilmsii	Harms	Shrub
Fabaceae	Aspalathus	abbottii	C.H.Stirt. & Muasya	Shrub
Fabaceae	Aspalathus	acanthes	Eckl. & Zeyh.	Shrub
Fabaceae	Aspalathus	acanthoclada	R.Dahlgren	Shrub
Fabaceae	Aspalathus	acanthophylla	Eckl. & Zeyh.	Shrub
Fabaceae	Aspalathus	acicularis	E.Mey.	Shrub
Fabaceae	Aspalathus	acidota	Garab. ex R.Dahlgren	Shrub
Fabaceae	Aspalathus	acocksii	(R.Dahlgren) R.Dahlgren	Shrub
Fabaceae	Aspalathus	aculeata	Thunb.	Shrub
Fabaceae	Aspalathus	acuminata	Lam.	Shrub
Fabaceae	Aspalathus	aemula	E.Mey.	Shrub
Fabaceae	Aspalathus	alopecurus	Benth.	Shrub
Fabaceae	Aspalathus	altissima	R.Dahlgren	Shrub
Fabaceae	Aspalathus	amoena	(R.Dahlgren) R.Dahlgren	Shrub
Fabaceae	Aspalathus	angustifolia	(Lam.) R.Dahlgren	Shrub
Fabaceae	Aspalathus	arenaria	R.Dahlgren	Shrub
Fabaceae	Aspalathus	argyrophanes	R.Dahlgren	Shrub
Fabaceae	Aspalathus	arida	E.Mey.	Shrub
Fabaceae	Aspalathus	asparagoides	L.f.	Shrub
Fabaceae	Aspalathus	astroites	L.	Shrub
Fabaceae	Aspalathus	aurantiaca	R.Dahlgren	Shrub
Fabaceae	Aspalathus	barbata	(Lam.) R.Dahlgren	Shrub
Fabaceae	Aspalathus	barbigera	R.Dahlgren	Shrub
Fabaceae	Aspalathus	borboniifolia	R.Dahlgren	Shrub
Fabaceae	Aspalathus	bowieana	(Benth.) R.Dahlgren	Shrub
Fabaceae	Aspalathus	burchelliana	Benth.	Shrub
Fabaceae	Aspalathus	candicans	W.T.Aiton	Shrub
Fabaceae	Aspalathus	capensis	(Walp.) R.Dahlgren	Shrub
Fabaceae	Aspalathus	capitata	L.	Shrub; Tree
Fabaceae	Aspalathus	carnosa	P.J.Bergius	Shrub
Fabaceae	Aspalathus	cephalotes	Thunb.	Shrub
Fabaceae	Aspalathus	chenopoda	L.	Shrub
Fabaceae	Aspalathus	ciliaris	L.	Shrub
Fabaceae	Aspalathus	cinerascens	E.Mey.	Shrub
Fabaceae	Aspalathus	cliffortioides	Bolus	Shrub
Fabaceae	Aspalathus	collina	Eckl. & Zeyh.	Shrub
Fabaceae	Aspalathus	commutata	(Vogel) R.Dahlgren	Shrub
Fabaceae	Aspalathus	compacta	R.Dahlgren	Shrub
Fabaceae	Aspalathus	cordata	(L.) R.Dahlgren	Shrub
Fabaceae	Aspalathus	corrudifolia	P.J.Bergius	Shrub
Fabaceae	Aspalathus	costulata	Benth.	Shrub
Fabaceae	Aspalathus	crenata	(L.) R.Dahlgren	Shrub
Fabaceae	Aspalathus	cymbiformis	DC.	Shrub
Fabaceae	Aspalathus	dahlgrenii	C.H.Stirt. & Muasya	Shrub
Fabaceae	Aspalathus	dasyantha	Eckl. & Zeyh.	Shrub
Fabaceae	Aspalathus	decora	R.Dahlgren	Shrub
Fabaceae	Aspalathus	densifolia	Benth.	Shrub
Fabaceae	Aspalathus	dianthopora	E.Phillips	Shrub
Fabaceae	Aspalathus	dunsdoniana	Alston ex R.Dahlgren	Shrub
Fabaceae	Aspalathus	elliptica	(E.Phillips) R.Dahlgren	Shrub
Fabaceae	Aspalathus	ericifolia	L.	Shrub
Fabaceae	Aspalathus	eriocephaloides	C.H.Stirt. & Muasya	Shrub
Fabaceae	Aspalathus	erythrodes	Eckl. & Zeyh.	Shrub
Fabaceae	Aspalathus	eustonbrownii	C.H.Stirt. & Muasya	Shrub
Fabaceae	Aspalathus	excelsa	R.Dahlgren	Shrub
Fabaceae	Aspalathus	fasciculata	(Thunb.) R.Dahlgren	Shrub
Fabaceae	Aspalathus	florifera	R.Dahlgren	Shrub
Fabaceae	Aspalathus	fourcadei	L.Bolus	Shrub
Fabaceae	Aspalathus	gerrardii	Bolus	Shrub
Fabaceae	Aspalathus	glabrata	R.Dahlgren	Shrub
Fabaceae	Aspalathus	glabrescens	R.Dahlgren	Shrub
Fabaceae	Aspalathus	globosa	Andrews	Shrub
Fabaceae	Aspalathus	grandiflora	Benth.	Shrub
Fabaceae	Aspalathus	hirta	E.Mey.	Shrub
Fabaceae	Aspalathus	hispida	Thunb.	Shrub
Fabaceae	Aspalathus	hystrix	L.f.	Shrub
Fabaceae	Aspalathus	juniperina	Thunb.	Shrub
Fabaceae	Aspalathus	katbergensis	(R.Dahlgren) R.Dahlgren	Shrub
Fabaceae	Aspalathus	lactea	Thunb.	Shrub
Fabaceae	Aspalathus	lamarckiana	R.Dahlgren	Shrub
Fabaceae	Aspalathus	latifolia	Bolus	Shrub
Fabaceae	Aspalathus	leucophylla	R.Dahlgren	Shrub
Fabaceae	Aspalathus	linearifolia	(Burm.f.) DC.	Shrub
Fabaceae	Aspalathus	longifolia	Benth.	Shrub
Fabaceae	Aspalathus	macrantha	Harv.	Shrub; Tree
Fabaceae	Aspalathus	macrocarpa	Eckl. & Zeyh.	Shrub
Fabaceae	Aspalathus	marginalis	Eckl. & Zeyh.	Shrub
Fabaceae	Aspalathus	microlithica	C.H.Stirt. & Muasya	Shrub
Fabaceae	Aspalathus	mundiana	Eckl. & Zeyh.	Shrub
Fabaceae	Aspalathus	muraltioides	Eckl. & Zeyh.	Shrub
Fabaceae	Aspalathus	myrtillifolia	Benth.	Shrub
Fabaceae	Aspalathus	neglecta	T.M.Salter	Shrub
Fabaceae	Aspalathus	nickhelmei	C.H.Stirt. & Muasya	Shrub
Fabaceae	Aspalathus	nivea	Thunb.	Shrub
Fabaceae	Aspalathus	oblongifolia	R.Dahlgren	Shrub
Fabaceae	Aspalathus	obtusata	Thunb.	Shrub
Fabaceae	Aspalathus	obtusifolia	R.Dahlgren	Shrub
Fabaceae	Aspalathus	odontoloba	R.Dahlgren	Shrub
Fabaceae	Aspalathus	oliveri	R.Dahlgren	Shrub
Fabaceae	Aspalathus	orbiculata	Benth.	Shrub
Fabaceae	Aspalathus	pachyloba	Benth.	Shrub
Fabaceae	Aspalathus	pallescens	Eckl. & Zeyh.	Shrub
Fabaceae	Aspalathus	pallidiflora	R.Dahlgren	Shrub
Fabaceae	Aspalathus	pedunculata	Houtt.	Shrub
Fabaceae	Aspalathus	pendula	R.Dahlgren	Shrub; Tree
Fabaceae	Aspalathus	perfoliata	(Lam.) R.Dahlgren	Shrub
Fabaceae	Aspalathus	petersonii	R.Dahlgren	Shrub
Fabaceae	Aspalathus	pinea	Thunb.	Shrub
Fabaceae	Aspalathus	pinguis	Thunb.	Shrub
Fabaceae	Aspalathus	puberula	(Eckl. & Zeyh.) R.Dahlgren	Shrub
Fabaceae	Aspalathus	pulicifolia	R.Dahlgren	Shrub
Fabaceae	Aspalathus	quartzicola	C.H.Stirt. & Muasya	Shrub
Fabaceae	Aspalathus	quinquefolia	L.	Shrub
Fabaceae	Aspalathus	ramosissima	R.Dahlgren	Shrub
Fabaceae	Aspalathus	ramulosa	E.Mey.	Shrub
Fabaceae	Aspalathus	rectistyla	R.Dahlgren	Shrub
Fabaceae	Aspalathus	recurvispina	R.Dahlgren	Shrub
Fabaceae	Aspalathus	rigidifolia	R.Dahlgren	Shrub
Fabaceae	Aspalathus	rostrata	Benth.	Shrub
Fabaceae	Aspalathus	rubiginosa	R.Dahlgren	Shrub
Fabaceae	Aspalathus	rugosa	Thunb.	Shrub
Fabaceae	Aspalathus	sanguinea	Thunb.	Shrub
Fabaceae	Aspalathus	sceptrum-aureum	R.Dahlgren	Shrub
Fabaceae	Aspalathus	secunda	E.Mey.	Shrub
Fabaceae	Aspalathus	securifolia	Eckl. & Zeyh.	Shrub
Fabaceae	Aspalathus	setacea	Eckl. & Zeyh.	Shrub
Fabaceae	Aspalathus	shawii	L.Bolus	Shrub
Fabaceae	Aspalathus	spectabilis	R.Dahlgren	Shrub
Fabaceae	Aspalathus	spinescens	Thunb.	Shrub
Fabaceae	Aspalathus	spinosa	L.	Shrub
Fabaceae	Aspalathus	spinosissima	R.Dahlgren	Shrub
Fabaceae	Aspalathus	steudeliana	Brongn.	Shrub
Fabaceae	Aspalathus	stokoei	L.Bolus	Shrub
Fabaceae	Aspalathus	stricticlada	(R.Dahlgren) R.Dahlgren	Shrub
Fabaceae	Aspalathus	teres	Eckl. & Zeyh.	Shrub
Fabaceae	Aspalathus	ternata	(Thunb.) Druce	Shrub
Fabaceae	Aspalathus	theresae	Cupido	Shrub
Fabaceae	Aspalathus	tridentata	L.	Shrub
Fabaceae	Aspalathus	truncata	Eckl. & Zeyh.	Shrub
Fabaceae	Aspalathus	tuberculata	Walp.	Shrub
Fabaceae	Aspalathus	tulbaghensis	R.Dahlgren	Shrub
Fabaceae	Aspalathus	ulicina	Eckl. & Zeyh.	Shrub
Fabaceae	Aspalathus	uniflora	L.	Shrub
Fabaceae	Aspalathus	usnoides	C.H.Stirt. & Muasya	Shrub
Fabaceae	Aspalathus	varians	Eckl. & Zeyh.	Shrub
Fabaceae	Aspalathus	venosa	E.Mey.	Shrub
Fabaceae	Aspalathus	verbasciformis	R.Dahlgren	Shrub
Fabaceae	Aspalathus	vermiculata	Lam.	Shrub
Fabaceae	Aspalathus	vulnerans	Thunb.	Shrub; Tree
Fabaceae	Aspalathus	willdenowiana	Benth.	Shrub
Fabaceae	Aspalathus	wittebergensis	Compton & P.E.Barnes	Shrub
Fabaceae	Aspalathus	wurmbeana	E.Mey.	Shrub
Fabaceae	Aspalathus	zeyheri	(Harv.) R.Dahlgren	Shrub
Fabaceae	Baphia	massaiensis	Taub.	Shrub; Tree
Fabaceae	Baphia	racemosa	(Hochst.) Baker	Shrub; Tree
Fabaceae	Bauhinia	bowkeri	Harv.	Shrub; Tree
Fabaceae	Bauhinia	galpinii	N.E.Br.	Climber; Shrub
Fabaceae	Bauhinia	natalensis	Oliv. ex Hook.	Shrub
Fabaceae	Bauhinia	petersiana	Bolle	Climber; Shrub; Tree
Fabaceae	Bauhinia	tomentosa	L.	Shrub; Tree
Fabaceae	Bolusanthus	speciosus	(Bolus) Harms	Tree
Fabaceae	Burkea	africana	Hook.	Tree
Fabaceae	Calobota	cuspidosa	(Burch.) Boatwr. & B.-E.van Wyk	Shrub
Fabaceae	Calobota	cytisoides	(Berg.) Eckl. & Zeyh.	Shrub
Fabaceae	Calobota	halenbergensis	(Merxm. ex A.Schreib.) Boatwr. & B.-E.van Wyk	Shrub
Fabaceae	Calobota	linearifolia	(E.Mey.) Boatwr. & B.-E.van Wyk	Shrub
Fabaceae	Calobota	lotononoides	(Schltr.) Boatwr. & B.-E.van Wyk	Shrub
Fabaceae	Calobota	pungens	(Thunb.) Boatwr. & B.-E.van Wyk	Shrub
Fabaceae	Calobota	spinescens	(Harv.) Boatwr. & B.-E.van Wyk	Shrub
Fabaceae	Calpurnia	aurea	(Aiton) Benth.	Shrub; Tree
Fabaceae	Calpurnia	capensis	(Burm.f.) Druce	Tree
Fabaceae	Calpurnia	floribunda	Harv.	Shrub; Tree
Fabaceae	Calpurnia	glabrata	Brummitt	Shrub; Tree
Fabaceae	Calpurnia	intrusa	(R.Br.) E.Mey.	Shrub
Fabaceae	Calpurnia	reflexa	A.J.Beaumont	Shrub; Tree
Fabaceae	Calpurnia	sericea	Harv.	Shrub
Fabaceae	Calpurnia	woodii	Schinz	Shrub
Fabaceae	Canavalia	ensiformis	(L.) DC.	Climber; Shrub
Fabaceae	Cassia	abbreviata	Oliv.	Shrub; Tree
Fabaceae	Colophospermum	mopane	(J.Kirk ex Benth.) J.Kirk ex J.Leonard	Tree
Fabaceae	Cordyla	africana	Lour.	Tree
Fabaceae	Craibia	zimmermannii	(Harms) Dunn	Tree
Fabaceae	Crotalaria	capensis	Jacq.	Shrub; Tree
Fabaceae	Crotalaria	doidgeae	I.Verd.	Shrub
Fabaceae	Crotalaria	laburnifolia	L.	Shrub
Fabaceae	Crotalaria	lebeckioides	Bond	Shrub
Fabaceae	Crotalaria	macrocarpa	E.Mey.	Shrub
Fabaceae	Crotalaria	natalensis	Baker f.	Shrub
Fabaceae	Crotalaria	spartioides	DC.	Shrub
Fabaceae	Crotalaria	virgultalis	Burch. ex DC.	Shrub
Fabaceae	Cullen	holubii	(Burtt Davy) C.H.Stirt.	Shrub
Fabaceae	Cyclopia	bowieana	Harv.	Shrub
Fabaceae	Cyclopia	burtonii	Hofmeyr & E.Phillips	Shrub
Fabaceae	Cyclopia	buxifolia	(Burm.f.) Kies	Shrub
Fabaceae	Cyclopia	falcata	(Harv.) Kies	Shrub
Fabaceae	Cyclopia	galioides	(P.J.Bergius) DC.	Shrub
Fabaceae	Cyclopia	genistoides	(L.) R.Br.	Shrub
Fabaceae	Cyclopia	intermedia	E.Mey.	Shrub
Fabaceae	Cyclopia	latifolia	DC.	Shrub
Fabaceae	Cyclopia	laxiflora	Benth.	Shrub
Fabaceae	Cyclopia	maculata	(Andrews) Kies	Shrub
Fabaceae	Cyclopia	meyeriana	Walp.	Shrub
Fabaceae	Cyclopia	pubescens	Eckl. & Zeyh.	Shrub
Fabaceae	Cyclopia	sessiliflora	Eckl. & Zeyh.	Shrub
Fabaceae	Cyclopia	squamosa	A.L.Schutte	Shrub
Fabaceae	Cyclopia	subternata	Vogel	Shrub
Fabaceae	Dalbergia	armata	E.Mey.	Climber; Shrub
Fabaceae	Dalbergia	melanoxylon	Guill. & Perr.	Shrub; Tree
Fabaceae	Dalbergia	multijuga	E.Mey.	Shrub; Tree
Fabaceae	Dalbergia	nitidula	Welw. ex Baker	Shrub; Tree
Fabaceae	Dalbergia	obovata	E.Mey.	Climber; Shrub; Tree
Fabaceae	Desmodium	asperum	(Poir.) Desr.	Shrub
Fabaceae	Dialium	schlechteri	Harms	Tree
Fabaceae	Dichrostachys	cinerea	(L.) Wight & Arn.	Shrub; Tree
Fabaceae	Elephantorrhiza	burkei	Benth.	Shrub; Tree
Fabaceae	Elephantorrhiza	goetzei	(Harms) Harms	Shrub; Tree
Fabaceae	Elephantorrhiza	praetermissa	J.H.Ross	Shrub
Fabaceae	Erythrina	caffra	Thunb.	Tree
Fabaceae	Erythrina	humeana	Spreng.	Shrub; Tree
Fabaceae	Erythrina	latissima	E.Mey.	Tree
Fabaceae	Erythrina	lysistemon	Hutch.	Tree
Fabaceae	Erythrophleum	lasianthum	Corbishley	Tree
Fabaceae	Faidherbia	albida	(Delile) A.Chev.	Tree
Fabaceae	Gelrebia	bracteata	(Germish.) Gagnon & G.P.Lewis	Shrub
Fabaceae	Gelrebia	rostrata	(N.E.Br.) Gagnon & G.P.Lewis	Shrub
Fabaceae	Guibourtia	conjugata	(Bolle) J.Leonard	Tree
Fabaceae	Guilandina	bonduc	L.	Climber; Shrub; Tree
Fabaceae	Hypocalyptus	coluteoides	(Lam.) R.Dahlgren	Shrub
Fabaceae	Hypocalyptus	sophoroides	(P.J.Bergius) Baill.	Shrub
Fabaceae	Indigofera	comosa	N.E.Br.	Shrub
Fabaceae	Indigofera	cuneifolia	Eckl. & Zeyh.	Shrub
Fabaceae	Indigofera	cytisoides	(L.) L.	Shrub
Fabaceae	Indigofera	damarana	Merxm. & A.Schreib.	Shrub
Fabaceae	Indigofera	denudata	L.f.	Shrub
Fabaceae	Indigofera	dolichothyrsa	Baker f.	Shrub
Fabaceae	Indigofera	egens	N.E.Br.	Shrub
Fabaceae	Indigofera	elandsbergensis	Phillipson	Shrub
Fabaceae	Indigofera	filifolia	Thunb.	Shrub
Fabaceae	Indigofera	frondosa	N.E.Br.	Shrub
Fabaceae	Indigofera	frutescens	L.f.	Shrub
Fabaceae	Indigofera	gifbergensis	C.H.Stirt. & Jarvie	Shrub
Fabaceae	Indigofera	grata	E.Mey.	Shrub
Fabaceae	Indigofera	hispida	Eckl. & Zeyh.	Shrub
Fabaceae	Indigofera	homblei	Baker f. & Martin	Shrub
Fabaceae	Indigofera	jucunda	Schrire	Shrub
Fabaceae	Indigofera	langebergensis	L.Bolus	Shrub
Fabaceae	Indigofera	lupatana	Baker f.	Shrub
Fabaceae	Indigofera	lyallii	Baker	Shrub; Tree
Fabaceae	Indigofera	masonae	N.E.Br.	Shrub
Fabaceae	Indigofera	micrantha	E.Mey.	Shrub
Fabaceae	Indigofera	nudicaulis	E.Mey.	Shrub
Fabaceae	Indigofera	ormocarpoides	Baker	Shrub
Fabaceae	Indigofera	ovina	Harv.	Shrub
Fabaceae	Indigofera	placida	N.E.Br.	Shrub
Fabaceae	Indigofera	rehmannii	Baker f.	Shrub
Fabaceae	Indigofera	rhodantha	Fourc.	Shrub
Fabaceae	Indigofera	schimperi	Jaub. & Spach	Shrub
Fabaceae	Indigofera	subcorymbosa	Baker	Shrub
Fabaceae	Indigofera	superba	C.H.Stirt.	Shrub
Fabaceae	Indigofera	swaziensis	Bolus	Shrub
Fabaceae	Indigofera	thesioides	Jarvie & C.H.Stirt.	Shrub
Fabaceae	Indigofera	tristoides	N.E.Br.	Shrub
Fabaceae	Kotschya	thymodora	(Baker f.) Wild	Shrub
Fabaceae	Lessertia	candida	E.Mey.	Shrub
Fabaceae	Lessertia	flexuosa	E.Mey.	Shrub
Fabaceae	Lessertia	lanata	Harv.	Shrub
Fabaceae	Lessertia	margaritacea	E.Mey.	Shrub
Fabaceae	Liparia	angustifolia	(Eckl. & Zeyh.) A.L.Schutte	Shrub
Fabaceae	Liparia	bonaespei	A.L.Schutte	Shrub
Fabaceae	Liparia	boucheri	(E.G.H.Oliv. & Fellingham) A.L.Schutte	Shrub
Fabaceae	Liparia	calycina	(L.Bolus) A.L.Schutte	Shrub
Fabaceae	Liparia	capitata	Thunb.	Shrub
Fabaceae	Liparia	confusa	A.L.Schutte	Shrub
Fabaceae	Liparia	congesta	A.L.Schutte	Shrub
Fabaceae	Liparia	genistoides	(Lam.) A.L.Schutte	Shrub
Fabaceae	Liparia	hirsuta	Thunb.	Shrub
Fabaceae	Liparia	laevigata	(L.) Thunb.	Shrub
Fabaceae	Liparia	latifolia	(Benth.) A.L.Schutte	Shrub
Fabaceae	Liparia	myrtifolia	Thunb.	Shrub
Fabaceae	Liparia	racemosa	A.L.Schutte	Shrub
Fabaceae	Liparia	rafnioides	A.L.Schutte	Shrub
Fabaceae	Liparia	splendens	(Burm.f.) Bos & de Wit	Shrub
Fabaceae	Liparia	striata	A.L.Schutte	Shrub
Fabaceae	Liparia	umbellifera	Thunb.	Shrub
Fabaceae	Liparia	vestita	Thunb.	Shrub
Fabaceae	Lotononis	alpina	(Eckl. & Zeyh.) B.-E.van Wyk	Shrub
Fabaceae	Lotononis	comptonii	B.-E.van Wyk	Shrub
Fabaceae	Lotononis	dahlgrenii	B.-E.van Wyk	Shrub
Fabaceae	Lotononis	densa	(Thunb.) Harv.	Shrub
Fabaceae	Lotononis	dichiloides	Sond.	Shrub
Fabaceae	Lotononis	dissitinodis	B.-E.van Wyk	Shrub
Fabaceae	Lotononis	divaricata	(Eckl. & Zeyh.) Benth.	Shrub
Fabaceae	Lotononis	eriocarpa	(E.Mey.) B.-E.van Wyk	Shrub
Fabaceae	Lotononis	glabrescens	(Dummer) B.-E.van Wyk	Shrub
Fabaceae	Lotononis	holosericea	(E.Mey.) B.-E.van Wyk	Shrub
Fabaceae	Lotononis	jacottetii	(Schinz) B.-E.van Wyk	Shrub
Fabaceae	Lotononis	meyeri	(C.Presl) B.-E.van Wyk	Shrub
Fabaceae	Lotononis	minor	Dummer & A.J.Jenn.	Shrub
Fabaceae	Lotononis	nutans	B.-E.van Wyk	Shrub
Fabaceae	Lotononis	sericophylla	Benth.	Shrub
Fabaceae	Lotononis	trichodes	(E.Mey.) B.-E.van Wyk	Shrub
Fabaceae	Millettia	grandis	(E.Mey.) Skeels	Tree
Fabaceae	Millettia	stuhlmannii	Taub.	Tree
Fabaceae	Mundulea	sericea	(Willd.) A.Chev.	Shrub; Tree
Fabaceae	Newtonia	hildebrandtii	(Vatke) Torre	Tree
Fabaceae	Ormocarpum	kirkii	S.Moore	Shrub; Tree
Fabaceae	Ormocarpum	trichocarpum	(Taub.) Engl.	Shrub; Tree
Fabaceae	Otholobium	acuminatum	(Lam.) C.H.Stirt.	Shrub
Fabaceae	Otholobium	arborescens	C.H.Stirt.	Shrub; Tree
Fabaceae	Otholobium	bracteolatum	(Eckl. & Zeyh.) C.H.Stirt.	Shrub
Fabaceae	Otholobium	caffrum	(Eckl. & Zeyh.) C.H.Stirt.	Shrub
Fabaceae	Otholobium	curtisiae	C.H.Stirt. & Muasya	Shrub
Fabaceae	Otholobium	flexuosum	C.H.Stirt.	Shrub
Fabaceae	Otholobium	foliosum	(Oliv.) C.H.Stirt.	Shrub
Fabaceae	Otholobium	fumeum	C.H.Stirt.	Shrub
Fabaceae	Otholobium	hamatum	(Harv.) C.H.Stirt.	Shrub
Fabaceae	Otholobium	heterosepalum	(Fourc.) C.H.Stirt.	Shrub
Fabaceae	Otholobium	hirtum	(L.) C.H.Stirt.	Shrub
Fabaceae	Otholobium	lucens	C.H.Stirt. & Muasya	Shrub
Fabaceae	Otholobium	macradenium	(Harv.) C.H.Stirt.	Shrub
Fabaceae	Otholobium	nigricans	C.H.Stirt.	Shrub
Fabaceae	Otholobium	nitens	C.H.Stirt. & Muasya	Shrub
Fabaceae	Otholobium	pictum	C.H.Stirt.	Shrub
Fabaceae	Otholobium	polystictum	(Benth. ex Harv.) C.H.Stirt.	Shrub
Fabaceae	Otholobium	prodiens	C.H.Stirt. & Muasya	Shrub
Fabaceae	Otholobium	pustulatum	C.H.Stirt.	Shrub
Fabaceae	Otholobium	sabulosum	C.H.Stirt. & Muasya	Shrub
Fabaceae	Otholobium	spicatum	(L.) C.H.Stirt.	Shrub
Fabaceae	Otholobium	spissum	C.H.Stirt. & Muasya	Shrub
Fabaceae	Otholobium	stachyerum	(Eckl. & Zeyh.) C.H.Stirt.	Shrub
Fabaceae	Otholobium	striatum	(Thunb.) C.H.Stirt.	Shrub; Tree
Fabaceae	Otholobium	trianthum	(E.Mey.) C.H.Stirt.	Shrub
Fabaceae	Otholobium	wilmsii	(Harms) C.H.Stirt.	Shrub; Tree
Fabaceae	Parkinsonia	africana	Sond.	Shrub; Tree
Fabaceae	Peltophorum	africanum	Sond.	Tree
Fabaceae	Philenoptera	bussei	(Harms) Schrire	Tree
Fabaceae	Philenoptera	sutherlandii	(Harv.) Schrire	Tree
Fabaceae	Philenoptera	violacea	(Klotzsch) Schrire	Tree
Fabaceae	Piliostigma	thonningii	(Schumach.) Milne-Redh.	Shrub; Tree
Fabaceae	Podalyria	argentea	(Salisb.) Salisb.	Shrub
Fabaceae	Podalyria	burchellii	DC.	Shrub
Fabaceae	Podalyria	calyptrata	(Retz.) Willd.	Shrub
Fabaceae	Podalyria	cordata	R.Br.	Shrub
Fabaceae	Podalyria	hirsuta	(Aiton) Willd.	Shrub
Fabaceae	Podalyria	lanceolata	(E.Mey.) Benth.	Shrub
Fabaceae	Podalyria	leipoldtii	L.Bolus ex A.L.Schutte	Shrub
Fabaceae	Podalyria	microphylla	E.Mey.	Shrub
Fabaceae	Podalyria	montana	Hutch.	Shrub
Fabaceae	Podalyria	myrtillifolia	(Retz.) Willd.	Shrub
Fabaceae	Podalyria	orbicularis	(E.Mey.) Eckl. & Zeyh.	Shrub
Fabaceae	Podalyria	pearsonii	E.Phillips	Shrub
Fabaceae	Podalyria	rotundifolia	(P.J.Bergius) A.L.Schutte	Shrub
Fabaceae	Podalyria	sericea	(Andrews) R.Br.	Shrub
Fabaceae	Polhillia	brevicalyx	(C.H.Stirt.) B.-E.van Wyk & A.L.Schutte	Shrub
Fabaceae	Polhillia	connata	(Harv.) C.H.Stirt.	Shrub
Fabaceae	Polhillia	curtisiae	C.H.Stirt. & Muasya	Shrub
Fabaceae	Polhillia	fortunata	du Preez	Shrub
Fabaceae	Polhillia	groenewaldii	du Preez	Shrub
Fabaceae	Polhillia	ignota	Boatwr.	Shrub
Fabaceae	Polhillia	involucrata	(Thunb.) B.-E.van Wyk & A.L.Schutte	Shrub
Fabaceae	Polhillia	obsoleta	(Harv.) B.-E.van Wyk	Shrub
Fabaceae	Polhillia	pallens	C.H.Stirt.	Shrub
Fabaceae	Polhillia	stirtoniana	du Preez	Shrub
Fabaceae	Polhillia	xairuensis	du Preez	Shrub
Fabaceae	Psoralea	aculeata	L.	Shrub
Fabaceae	Psoralea	affinis	Eckl. & Zeyh.	Shrub
Fabaceae	Psoralea	angustifolia	L'Her. ex Aiton	Shrub; Tree
Fabaceae	Psoralea	aphylla	L.	Shrub
Fabaceae	Psoralea	axillaris	L.f.	Shrub
Fabaceae	Psoralea	brilliantissima	C.H.Stirt., Muasya & A.Bello	Shrub
Fabaceae	Psoralea	congesta	C.H.Stirt. & Muasya	Shrub
Fabaceae	Psoralea	diturnerae	A.Bello, C.H.Stirt. & Muasya	Shrub
Fabaceae	Psoralea	elegans	C.H.Stirt.	Shrub
Fabaceae	Psoralea	ensifolia	(Houtt.) Merr.	Shrub
Fabaceae	Psoralea	fascicularis	DC.	Shrub
Fabaceae	Psoralea	filifolia	Eckl. & Zeyh.	Shrub
Fabaceae	Psoralea	fleta	C.H.Stirt.	Shrub; Tree
Fabaceae	Psoralea	floccosa	C.H.Stirt., Muasya & A.Bello	Shrub
Fabaceae	Psoralea	forbesiae	C.H.Stirt., A.Bello & Muasya	Shrub
Fabaceae	Psoralea	gigantea	Dludlu, Muasya & C.H.Stirt.	Tree
Fabaceae	Psoralea	glaucescens	Eckl. & Zeyh.	Shrub
Fabaceae	Psoralea	imminens	C.H.Stirt.	Shrub
Fabaceae	Psoralea	ivumba	C.H.Stirt., A.Bello & Muasya	Shrub
Fabaceae	Psoralea	keetii	Schonland ex H.M.L.Forbes	Shrub
Fabaceae	Psoralea	kougaensis	C.H.Stirt., Muasya & A.Bello	Shrub
Fabaceae	Psoralea	latifolia	(Harv.) C.H.Stirt.	Shrub
Fabaceae	Psoralea	margaretiflora	C.H.Stirt. & V.R.Clark	Shrub
Fabaceae	Psoralea	montana	A.Bello, C.H.Stirt. & Muasya	Shrub; Tree
Fabaceae	Psoralea	muirii	C.H.Stirt. & Muasya	Shrub
Fabaceae	Psoralea	odoratissima	Jacq.	Shrub
Fabaceae	Psoralea	oligophylla	Eckl. & Zeyh.	Shrub
Fabaceae	Psoralea	peratica	C.H.Stirt.	Shrub; Tree
Fabaceae	Psoralea	pinnata	L.	Shrub; Tree
Fabaceae	Psoralea	pullata	C.H.Stirt.	Shrub
Fabaceae	Psoralea	ramulosa	C.H.Stirt.	Shrub
Fabaceae	Psoralea	sordida	C.H.Stirt. & Muasya	Shrub
Fabaceae	Psoralea	speciosa	Eckl. & Zeyh.	Shrub
Fabaceae	Psoralea	suaveolens	C.H.Stirt., A.Bello & Muasya	Shrub
Fabaceae	Psoralea	tenuifolia	L.	Shrub; Tree
Fabaceae	Psoralea	triflora	Thunb.	Shrub
Fabaceae	Psoralea	usitata	C.H.Stirt.	Shrub
Fabaceae	Psoralea	vanberkelae	C.H.Stirt., A.Bello & Muasya	Shrub
Fabaceae	Psoralea	verrucosa	Willd.	Shrub
Fabaceae	Pterocarpus	angolensis	DC.	Tree
Fabaceae	Pterocarpus	lucens	Lepr. ex Guill. & Perr.	Tree
Fabaceae	Pterocarpus	rotundifolius	(Sond.) Druce	Shrub; Tree
Fabaceae	Pterolobium	stellatum	(Forssk.) Brenan	Climber; Shrub
Fabaceae	Rafnia	alata	G.J.Campb. & B.-E.van Wyk	Shrub
Fabaceae	Rafnia	amplexicaulis	(L.) Thunb.	Shrub
Fabaceae	Rafnia	angulata	Thunb.	Shrub
Fabaceae	Rafnia	capensis	(L.) Schinz	Shrub
Fabaceae	Rafnia	elliptica	Thunb.	Shrub
Fabaceae	Rafnia	racemosa	Eckl. & Zeyh.	Shrub
Fabaceae	Rafnia	triflora	Thunb.	Shrub
Fabaceae	Rhynchosia	angustifolia	(Jacq.) DC.	Climber; Shrub
Fabaceae	Rhynchosia	argentea	(Thunb.) Harv.	Climber; Shrub
Fabaceae	Rhynchosia	arida	C.H.Stirt.	Shrub
Fabaceae	Rhynchosia	chrysoscias	Benth. ex Harv.	Climber; Shrub
Fabaceae	Rhynchosia	emarginata	Germish.	Shrub
Fabaceae	Rhynchosia	galpinii	Baker f.	Shrub
Fabaceae	Rhynchosia	komatiensis	Harms	Shrub
Fabaceae	Rhynchosia	leucoscias	Benth. ex Harv.	Climber; Shrub
Fabaceae	Rhynchosia	microscias	Benth. ex Harv.	Climber; Shrub
Fabaceae	Rhynchosia	nitens	Benth. ex Harv.	Shrub
Fabaceae	Rhynchosia	resinosa	(Hochst. ex A.Rich.) Baker	Climber; Shrub
Fabaceae	Rhynchosia	schlechteri	Baker f.	Shrub
Fabaceae	Schotia	afra	(L.) Thunb.	Shrub; Tree
Fabaceae	Schotia	brachypetala	Sond.	Tree
Fabaceae	Schotia	capitata	Bolle	Shrub; Tree
Fabaceae	Schotia	latifolia	Jacq.	Tree
Fabaceae	Senegalia	ataxacantha	(DC.) Kyal. & Boatwr.	Tree; shrub
Fabaceae	Senegalia	brevispica	(Harms) Seigler & Ebinger	Tree; shrub
Fabaceae	Senegalia	burkei	(Benth.) Kyal. & Boatwr.	Tree
Fabaceae	Senegalia	caffra	(Thunb.) P.J.H.Hurter & Mabb.	Tree; shrub
Fabaceae	Senegalia	circummarginata	(Chiov.) Kyal. & Boatwr.	Tree
Fabaceae	Senegalia	erubescens	(Welw. ex Oliv.) Kyal. & Boatwr.	Tree; shrub
Fabaceae	Senegalia	fleckii	(Schinz) Boatwr.	Shrub; Tree
Fabaceae	Senegalia	galpinii	(Burtt Davy) Seigler & Ebinger	Tree
Fabaceae	Senegalia	hereroensis	(Engl.) Kyal. & Boatwr.	Tree; shrub
Fabaceae	Senegalia	kraussiana	(Meisn. ex Benth.) Kyal. & Boatwr.	Shrub
Fabaceae	Senegalia	loetteri	N.Hahn	Tree; shrub
Fabaceae	Senegalia	mellifera	(Vahl) Seigler & Ebinger	Shrub; Tree
Fabaceae	Senegalia	montis-salinarum	N.Hahn	Tree
Fabaceae	Senegalia	nigrescens	(Oliv.) P.J.H.Hurter	Tree
Fabaceae	Senegalia	polyacantha	(Willd.) Seigler & Ebinger	Tree
Fabaceae	Senegalia	schweinfurthii	(Brenan & Exell) Seigler & Ebinger	Climber; Shrub
Fabaceae	Senegalia	senegal	(L.) Britton	Shrub; Tree
Fabaceae	Senegalia	welwitschii	(Oliv.) Kyal. & Boatwr.	Tree
Fabaceae	Senna	petersiana	(Bolle) Lock	Shrub; Tree
Fabaceae	Sesbania	sesban	(L.) Merr.	Shrub; Tree
Fabaceae	Sophora	inhambanensis	Klotzsch	Shrub; Tree
Fabaceae	Stirtonanthus	chrysanthus	(Adamson) B.-E.van Wyk & A.L.Schutte	Shrub
Fabaceae	Stirtonanthus	insignis	(Compton) B.-E.van Wyk & A.L.Schutte	Shrub
Fabaceae	Stirtonanthus	taylorianus	(L.Bolus) B.-E.van Wyk & A.L.Schutte	Shrub; Tree
Fabaceae	Tephrosia	aequilata	Baker	Shrub
Fabaceae	Tephrosia	grandiflora	(Aiton) Pers.	Shrub
Fabaceae	Tephrosia	pondoensis	(Codd) Schrire	Tree
Fabaceae	Umtiza	listeriana	Sim	Tree
Fabaceae	Vachellia	borleae	(Burtt Davy) Kyal. & Boatwr.	Shrub; Tree
Fabaceae	Vachellia	davyi	(N.E.Br.) Kyal. & Boatwr.	Shrub; Tree
Fabaceae	Vachellia	dyeri	(P.P.Sw. ex Coates Palgr.) Kyal. & Boatwr.	Tree
Fabaceae	Vachellia	ebutsiniorum	(P.J.H.Hurter) Kyal. & Boatwr.	Tree
Fabaceae	Vachellia	erioloba	(E.Mey.) P.J.H.Hurter	Tree
Fabaceae	Vachellia	exuvialis	(I.Verd.) Kyal. & Boatwr.	Shrub; Tree
Fabaceae	Vachellia	gerrardii	(Benth.) P.J.H.Hurter	Shrub; Tree
Fabaceae	Vachellia	grandicornuta	(Gerstner) Seigler & Ebinger	Tree
Fabaceae	Vachellia	haematoxylon	(Willd.) Seigler & Ebinger	Shrub; Tree
Fabaceae	Vachellia	hebeclada	(DC.) Kyal. & Boatwr.	Shrub; Tree
Fabaceae	Vachellia	karroo	(Hayne) Banfi & Galasso	Shrub; Tree
Fabaceae	Vachellia	kosiensis	(P.P.Sw. ex Coates Palgr.) Kyal. & Boatwr.	Tree
Fabaceae	Vachellia	luederitzii	(Engl.) Kyal. & Boatwr.	Shrub; Tree
Fabaceae	Vachellia	natalitia	(E.Mey.) Kyal. & Boatwr.	Tree
Fabaceae	Vachellia	nebrownii	(Burtt Davy) Seigler & Ebinger	Shrub; Tree
Fabaceae	Vachellia	nilotica	(L.) P.J.H.Hurter & Mabb.	Shrub; Tree
Fabaceae	Vachellia	ormocarpoides	(P.J.H.Hurter) Kyal. & Boatwr.	Tree
Fabaceae	Vachellia	permixta	(Burtt Davy) Kyal. & Boatwr.	Shrub; Tree
Fabaceae	Vachellia	rehmanniana	(Schinz) Kyal. & Boatwr.	Shrub; Tree
Fabaceae	Vachellia	robbertsei	(P.P.Sw. ex Coates Palgr.) Kyal. & Boatwr.	Tree
Fabaceae	Vachellia	robusta	(Burch.) Kyal. & Boatwr.	Tree
Fabaceae	Vachellia	sekhukhuniensis	(P.J.H.Hurter) Kyal. & Boatwr.	Tree
Fabaceae	Vachellia	sieberiana	(DC.) Kyal. & Boatwr.	Tree
Fabaceae	Vachellia	stuhlmannii	(Taub.) Kyal. & Boatwr.	Shrub; Tree
Fabaceae	Vachellia	swazica	(Burtt Davy) Kyal. & Boatwr.	Tree
Fabaceae	Vachellia	tenuispina	(I.Verd.) Kyal. & Boatwr.	Shrub
Fabaceae	Vachellia	theronii	(P.P.Sw.) Boatwr.	Tree
Fabaceae	Vachellia	tortilis	(Forssk.) Galasso & Banfi	Shrub; Tree
Fabaceae	Vachellia	xanthophloea	(Benth.) P.J.H.Hurter	Tree
Fabaceae	Virgilia	divaricata	Adamson	Tree
Fabaceae	Virgilia	oroboides	(P.J.Bergius) T.M.Salter	Tree
Fabaceae	Wiborgia	fusca	Thunb.	Shrub
Fabaceae	Wiborgia	leptoptera	R.Dahlgren	Shrub
Fabaceae	Wiborgia	monoptera	E.Mey.	Shrub
Fabaceae	Wiborgia	obcordata	(P.J.Bergius) Thunb.	Shrub
Fabaceae	Wiborgia	tenuifolia	E.Mey.	Shrub
Fabaceae	Wiborgia	tetraptera	E.Mey.	Shrub
Fabaceae	Wiborgiella	bowieana	(Benth.) Boatwr. & B.-E.van Wyk	Shrub
Fabaceae	Wiborgiella	leipoldtiana	(Schltr. ex R.Dahlgren) Boatwr. & B.-E.van Wyk	Shrub
Fabaceae	Wiborgiella	sessilifolia	(Eckl. & Zeyh.) Boatwr. & B.-E.van Wyk	Shrub
Fabaceae	Xanthocercis	zambesiaca	(Baker) Dumaz-le-Grand	Tree
Fabaceae	Xerocladia	viridiramis	(Burch.) Taub.	Shrub
Fabaceae	Xeroderris	stuhlmannii	(Taub.) Mendonça & E.P.Sousa	Tree
Fabaceae	Xiphotheca	canescens	(Thunb.) A.L.Schutte & B.-E.van Wyk	Shrub
Fabaceae	Xiphotheca	cordifolia	A.L.Schutte & B.-E.van Wyk	Shrub
Fabaceae	Xiphotheca	phylicoides	A.L.Schutte & B.-E.van Wyk	Shrub
Fabaceae	Xiphotheca	rosmarinifolia	A.L.Schutte	Shrub
Fabaceae	Xylia	torreana	Brenan	Tree
Geissolomataceae	Geissoloma	marginata	(L.) A.Juss.	Shrub
Gentianaceae	Anthocleista	grandiflora	Gilg	Tree
Geraniaceae	Pelargonium	albersii	M.Becker	Shrub
Geraniaceae	Pelargonium	angustipetalum	E.M.Marais	Shrub
Geraniaceae	Pelargonium	antidysentericum	(Eckl. & Zeyh.) Kostel.	Shrub
Geraniaceae	Pelargonium	burgerianum	J.J.A.van der Walt	Shrub
Geraniaceae	Pelargonium	citronellum	J.J.A.van der Walt	Shrub
Geraniaceae	Pelargonium	cordifolium	(Cav.) Curtis	Shrub
Geraniaceae	Pelargonium	cucullatum	(L.) L'Her.	Shrub
Geraniaceae	Pelargonium	denticulatum	Jacq.	Shrub
Geraniaceae	Pelargonium	glutinosum	(Jacq.) L'Her.	Shrub
Geraniaceae	Pelargonium	graveolens	L'Her.	Shrub
Geraniaceae	Pelargonium	greytonense	J.J.A.van der Walt	Shrub
Geraniaceae	Pelargonium	hermanniifolium	(P.J.Bergius) Jacq.	Shrub
Geraniaceae	Pelargonium	hispidum	(L.f.) Willd.	Shrub
Geraniaceae	Pelargonium	inquinans	(L.) L'Her.	Shrub
Geraniaceae	Pelargonium	ionidiflorum	(Eckl. & Zeyh.) F.Dietr.	Shrub
Geraniaceae	Pelargonium	keerombergense	M.Becker & F.Albers	Shrub
Geraniaceae	Pelargonium	panduriforme	Eckl. & Zeyh.	Shrub
Geraniaceae	Pelargonium	papilionaceum	(L.) L'Her.	Shrub
Geraniaceae	Pelargonium	praemorsum	(Andrews) F.Dietr.	Shrub
Geraniaceae	Pelargonium	pseudoglutinosum	R.Knuth	Shrub
Geraniaceae	Pelargonium	quercifolium	(L.f.) L'Her.	Shrub
Geraniaceae	Pelargonium	radens	H.E.Moore	Shrub
Geraniaceae	Pelargonium	ribifolium	Jacq.	Shrub
Geraniaceae	Pelargonium	scabroide	R.Knuth	Shrub
Geraniaceae	Pelargonium	scabrum	(L.) L'Her.	Shrub
Geraniaceae	Pelargonium	sublignosum	R.Knuth	Shrub
Geraniaceae	Pelargonium	vitifolium	(L.) L'Her.	Shrub
Gerrardinaceae	Gerrardina	foliosa	Oliv.	Shrub; Tree
Grubbiaceae	Grubbia	rosmarinifolia	P.J.Bergius	Shrub
Grubbiaceae	Grubbia	rourkei	Carlquist	Shrub
Grubbiaceae	Grubbia	tomentosa	(Thunb.) Harms	Shrub
Hamamelidaceae	Trichocladus	crinitus	(Thunb.) Pers.	Tree; Shrub
Hamamelidaceae	Trichocladus	ellipticus	Eckl. & Zeyh.	Tree; Shrub
Hamamelidaceae	Trichocladus	grandiflorus	Oliv.	Shrub; Tree
Hernandiaceae	Gyrocarpus	americanus	Jacq.	Tree
Heteropyxidaceae	Heteropyxis	canescens	Oliv.	Tree
Heteropyxidaceae	Heteropyxis	dehniae	Suess.	Shrub; Tree
Heteropyxidaceae	Heteropyxis	natalensis	Harv.	Shrub; Tree
Hypericaceae	Hypericum	revolutum	Vahl	Shrub
Hypericaceae	Hypericum	roeperianum	G.W.Schimp. ex A.Rich.	Tree; Shrub
Icacinaceae	Apodytes	abbottii	Potgieter & A.E.van Wyk	Shrub; Tree
Icacinaceae	Apodytes	dimidiata	E.Mey. ex Arn.	Shrub; Tree
Icacinaceae	Apodytes	geldenhuysii	A.E.van Wyk & Potgieter	Shrub; Tree
Icacinaceae	Cassinopsis	ilicifolia	(Hochst.) Sleumer	Tree; Shrub
Icacinaceae	Cassinopsis	tinifolia	Harv.	Shrub; Tree
Icacinaceae	Pyrenacantha	grandiflora	Baill.	Climber; Shrub
Icacinaceae	Pyrenacantha	scandens	Planch. ex Harv.	Climber; Shrub
Iridaceae	Klattia	flava	(G.J.Lewis) Goldblatt	Shrub
Iridaceae	Klattia	partita	Baker	Shrub
Iridaceae	Klattia	stokoei	L.Guthrie	Shrub
Iridaceae	Nivenia	argentea	Goldblatt	Shrub
Iridaceae	Nivenia	binata	Klatt	Shrub
Iridaceae	Nivenia	corymbosa	(Ker Gawl.) Baker	Shrub
Iridaceae	Nivenia	dispar	N.E.Br.	Shrub
Iridaceae	Nivenia	fruticosa	(L.f.) Baker	Shrub
Iridaceae	Nivenia	inaequalis	Goldblatt & J.C.Manning	Shrub
Iridaceae	Nivenia	parviflora	Goldblatt	Shrub
Iridaceae	Nivenia	stenosiphon	Goldblatt	Shrub
Iridaceae	Nivenia	stokoei	(L.Guthrie) N.E.Br.	Shrub
Iridaceae	Witsenia	maura	Thunb.	Shrub
Kirkiaceae	Kirkia	acuminata	Oliv.	Tree
Kirkiaceae	Kirkia	wilmsii	Engl.	Tree
Lamiaceae	Clerodendrum	africanum	Moldenke	Shrub; Tree
Lamiaceae	Clerodendrum	makanjanum	H.J.P.Winkl.	Shrub
Lamiaceae	Clerodendrum	pleiosciadium	Gurke	Shrub
Lamiaceae	Karomia	speciosa	(Hutch. & Corbishley) R.Fern.	Shrub
Lamiaceae	Leonotis	dubia	E.Mey.	Shrub
Lamiaceae	Leonotis	intermedia	Lindl.	Shrub
Lamiaceae	Leonotis	leonurus	(L.) R.Br.	Shrub
Lamiaceae	Leonotis	randii	S.Moore	Shrub
Lamiaceae	Leonotis	schinzii	Gurke	Shrub
Lamiaceae	Ocimum	burchellianum	Benth.	Shrub
Lamiaceae	Ocimum	labiatum	(N.E.Br.) A.J.Paton	Shrub
Lamiaceae	Ocimum	natalense	Ayob. ex A.J.Paton	Shrub
Lamiaceae	Ocimum	serratum	(Schltr.) A.J.Paton	Shrub
Lamiaceae	Ocimum	tubiforme	(R.D.Good) A.J.Paton	Shrub
Lamiaceae	Orthosiphon	fruticosus	Codd	Shrub
Lamiaceae	Platostoma	rotundifolium	(Briq.) A.J.Paton	Shrub
Lamiaceae	Plectranthus	ecklonii	Benth.	Shrub
Lamiaceae	Plectranthus	mzimvubuensis	Van Jaarsv.	Shrub
Lamiaceae	Plectranthus	porcatus	Van Jaarsv. & P.J.D.Winter	Shrub
Lamiaceae	Premna	mooiensis	(H.Pearson) W.Piep.	Tree
Lamiaceae	Salvia	africana	L.	Shrub
Lamiaceae	Salvia	aurea	L.	Shrub
Lamiaceae	Salvia	chamelaeagnea	P.J.Bergius	Shrub
Lamiaceae	Salvia	dentata	Aiton	Shrub
Lamiaceae	Salvia	dolomitica	Codd	Shrub
Lamiaceae	Salvia	garipensis	E.Mey. ex Benth.	Shrub
Lamiaceae	Salvia	lanceolata	Lam.	Shrub
Lamiaceae	Salvia	muirii	L.Bolus	Shrub
Lamiaceae	Salvia	namaensis	Schinz	Shrub
Lamiaceae	Salvia	thermarum	Van Jaarsv.	Shrub
Lamiaceae	Stachys	aurea	Benth.	Shrub
Lamiaceae	Stachys	burchelliana	Launert	Shrub
Lamiaceae	Stachys	caffra	E.Mey. ex Benth.	Shrub
Lamiaceae	Stachys	cuneata	Banks ex Benth.	Shrub
Lamiaceae	Stachys	flavescens	Benth.	Shrub
Lamiaceae	Stachys	lamarckii	Benth.	Shrub
Lamiaceae	Stachys	rugosa	Aiton	Shrub
Lamiaceae	Stachys	zeyheri	Skan	Shrub
Lamiaceae	Syncolostemon	albiflorus	(N.E.Br.) D.F.Otieno	Shrub
Lamiaceae	Syncolostemon	bolusii	(N.E.Br.) D.F.Otieno	Shrub
Lamiaceae	Syncolostemon	cinereum	(Codd) D.F.Otieno & Retief	Shrub
Lamiaceae	Syncolostemon	densiflorus	Benth.	Shrub
Lamiaceae	Syncolostemon	eriocephalus	I.Verd.	Shrub
Lamiaceae	Syncolostemon	incanus	(Codd) D.F.Otieno	Shrub
Lamiaceae	Syncolostemon	latidens	(N.E.Br.) Codd	Shrub
Lamiaceae	Syncolostemon	macranthus	(Gurke) M.Ashby	Shrub
Lamiaceae	Syncolostemon	obermeyerae	(M.Ashby) D.F.Otieno	Shrub
Lamiaceae	Syncolostemon	parvifolius	(Codd) D.F.Otieno	Shrub
Lamiaceae	Syncolostemon	petiolatus	(M.Ashby) D.F.Otieno	Shrub
Lamiaceae	Syncolostemon	punctatus	(Codd) D.F.Otieno	Shrub
Lamiaceae	Syncolostemon	ramosus	(Codd) D.F.Otieno	Shrub
Lamiaceae	Syncolostemon	ramulosus	E.Mey. ex Benth.	Shrub
Lamiaceae	Syncolostemon	rehmannii	(Gurke) D.F.Otieno	Shrub
Lamiaceae	Syncolostemon	rotundifolius	E.Mey. ex Benth.	Shrub
Lamiaceae	Syncolostemon	rugosifolius	(M.Ashby) D.F.Otieno	Shrub
Lamiaceae	Syncolostemon	stenophyllus	(Gurke) D.F.Otieno	Shrub
Lamiaceae	Tetradenia	tuberosa	T.J.Edwards	Shrub
Lamiaceae	Tinnea	barbata	Vollesen	Shrub
Lamiaceae	Tinnea	rhodesiana	S.Moore	Shrub
Lamiaceae	Vitex	ferruginea	Schumach. & Thonn.	Shrub
Lamiaceae	Vitex	harveyana	H.Pearson	Shrub
Lamiaceae	Vitex	obovata	E.Mey.	Tree
Lamiaceae	Vitex	patula	E.A.Bruce	Shrub
Lamiaceae	Vitex	pooara	Corbishley	Tree
Lamiaceae	Vitex	rehmannii	Gurke	Tree
Lamiaceae	Vitex	zeyheri	Sond.	Tree
Lauraceae	Cryptocarya	angustifolia	E.Mey. ex Meisn.	Shrub; Tree
Lauraceae	Cryptocarya	latifolia	Sond.	Tree
[truncated: 1,023 more rows]
